1 **Title: Evolution and genetic basis of the plant-penetrating ovipositor, a key adaptation in**

2 **herbivorous Drosophilidae**

3

4 **Authors:** Julianne N. **Authors:** Julianne N. Peláez<sup>1\*§</sup>, Andrew D. Gloss<sup>2,\*</sup>, Julianne F. Ray<sup>3</sup>,

5 Joseph L.M. Charboneau<sup>4</sup>, Kirsten I. Verster,<sup>1</sup> Noah K. Whiteman<sup>1§</sup>

6

7 **Affiliations:**

8 <sup>1</sup> Department of Integrative Biology, University of California, Berkeley

9 <sup>2</sup> Department of Ecology and Evolution, University of Chicago

10 <sup>3</sup> Department of Molecular and Cellular Biology, University of Arizona

11 <sup>4</sup> Department of Ecology and Evolutionary Biology, University of Arizona

12 \* These authors contributed equally.

13

14 § Corresponding authors: Whiteman, N.K. ([whiteman@berkeley.edu](mailto:whiteman@berkeley.edu)); Pelaez, J.N.

15 ([juliannepelaez@gmail.com](mailto:juliannepelaez@gmail.com))

16

17

18

19

20

21

22

## 23 Abstract

24 Herbivorous insects are extraordinarily diverse, yet are found in only one-third of insect orders.  
25 This skew may result from barriers to plant colonization, coupled with phylogenetic constraint on  
26 plant-colonizing adaptations. Physical barriers have been surmounted through the evolution of key  
27 morphological innovations, such as the plant-penetrating ovipositor. Despite their significance, the  
28 evolution and genetic basis of such innovations have not been well studied. Ovipositors densely  
29 lined with hard bristles have evolved repeatedly in herbivorous lineages within the Drosophilidae.  
30 Here, we focus on the evolution of this trait in *Scaptomyza*, an herbivorous radiation nested in a  
31 microbe-feeding clade, sister to Hawaiian *Drosophila*. Our phylogenetic approach revealed that  
32 ovipositor bristle number increased as herbivory evolved. We then dissected the genomic  
33 architecture of variation in ovipositor bristle number within *S. flava* through a genome wide  
34 association study. Top associated variants were enriched for transcriptional repressors, and the  
35 strongest associations included genes contributing to peripheral nervous system development.  
36 Genotyping individual flies replicated the association at a variant upstream of *Gai*, a neural  
37 development gene, contributing to a gain of 0.58 bristles/major allele. These results suggest that  
38 regulatory variation involving conserved developmental genes contributes to a key morphological  
39 adaptation required for plant colonization.

40  
41  
42  
43  
44  
45  
46  
47  
48  
49  
50

## 51 Introduction

52           Herbivorous insects are among the most successful animal radiations [1,2], representing  
53 approximately one quarter of animal species [3]. Yet, they are found in only one-third of extant  
54 insect orders [1], suggesting phylogenetic constraint on adaptations required for this transition.  
55 Indeed, the evolution of herbivory requires multi-faceted adaptations, including: locating  
56 appropriate host plants, attachment to the host, resisting desiccation, and feeding on nutritionally  
57 unbalanced, chemically- and physically-defended plant tissues [4]. Despite the paucity of insect  
58 orders with herbivorous species, herbivory evolved many times independently *within* orders [2],  
59 including at least 25 times within Diptera [5]. Identifying whether these clades possess key  
60 innovations associated with this repeated evolution may help resolve this paradox [6].

61           The plant-penetrating ovipositor is one such key innovation [7] facilitating entry into this  
62 new ecological niche and driving species radiations. It has evolved alongside major species  
63 radiations of true fruit flies (Tephritidae), leaf-mining flies (Agromyzidae) and leafhoppers  
64 (Cicadellidae), which together comprise ~27,500 species, as well as lineages of sawflies  
65 (Tenthredinidae), katydids (Tettigoniidae), and plant bugs (Miridae) [8]. The insertion of eggs into  
66 plant tissue overcomes the challenges of host attachment, desiccation, and access to physically-  
67 defended tissues [4]. It also allows neonate larvae to hatch directly into the leaf interior, providing  
68 protection from the physical environment and enemies [9]. Some insects with plant-penetrating  
69 ovipositors, like agromyzid flies, also consume leaf exudates from oviposition wounds, enabling  
70 herbivorous feeding in adults even in the absence of chewing mouthparts, and providing access to  
71 novel trophic resources.

72           The Drosophilidae is a compelling species radiation for studying the plant-penetrating  
73 ovipositor as a key innovation for the evolution of herbivory. While most drosophilid species feed

74 on decaying plant tissues, bacteria, and fungi, plant-penetrating ovipositors are found in at least  
75 three lineages that evolved herbivory independently: (1) *D. suzukii*, a generalist pest of ripe fruit  
76 [10], (2) leaf-mining species within the subgenus *Scaptomyza* (phylogenetically nested within the  
77 paraphyletic genus *Drosophila*), which includes the model herbivore *Scaptomyza flava*, a  
78 specialized pest of Brassicaceae crops [11], and (3) *Scaptodrosophila notha*, a specialist of living  
79 bracken fern (*Pteridium* spp.) [12]. All three lineages bear sclerotized ovipositors, studded with  
80 sharp, enlarged marginal bristles used to pierce or scrape into living plant tissue. Drosophilid flies  
81 are already models for the evolution of ecological specialization [13] and herbivory, [14] and high-  
82 quality genome assemblies across the genus [15] and functional data from *D. melanogaster* enable  
83 identification of loci underlying adaptations.

84         Here, we focus on the evolution of the ovipositor in herbivorous *Scaptomyza*, particularly  
85 *S. flava*. In addition to morphological changes to the ovipositor, *S. flava* has acquired a stereotyped  
86 behavioral repertoire for leaf puncturing: they tap the ovipositor around the leaf searching for an  
87 appropriate location, scoop a hole by repeatedly opening the two oviscapes laterally, then pause  
88 briefly, turn counterclockwise, and use their proboscis to imbibe the leaf exudates (Supplemental  
89 Videos S1, S2). Females create tens to thousands of punctures per day and oviposit into a small  
90 percentage of them [16]. Neonate larvae immediately begin feeding on mesophyll tissue, mining  
91 leaves until pupation (Fig. 1a). Those hatching outside of the leaf do not survive [11].

92         Although the ovipositors of herbivorous drosophilids differ noticeably in many aspects of  
93 their shape and size, most species (exceptions include *Scaptomyza flavella* [17] and  
94 *Scaptodrosophila megagenys* [12]) share a single row of supernumerary bristles along the ventral  
95 margin (e.g. Fig. 1b, c). We therefore focused on bristle number, which has been well-studied from  
96 a quantitative genetics and developmental biology perspective [18]. We first investigated whether

97 ancestral increases in ovipositor bristle number paralleled the transition to herbivory in  
98 *Scaptomyza*, using phylogenetic generalized least squares (PGLS) methods and ancestral state  
99 reconstruction (ASR). To understand the nature of mutations (i.e. coding versus regulatory, mono-  
100 versus polygenic, and candidate developmental processes involved) that could have given rise to  
101 increased ovipositor bristle number, we used pooled genome-wide association mapping (pool-  
102 GWAS) [19,20] within the herbivorous species *S. flava*. Finally, we sought to validate our pool-  
103 GWAS by genotyping individuals and estimating the effect size of a single nucleotide  
104 polymorphism (SNP) that reached genome-wide significance.

105

## 106 Materials and Methods

### 107 (a) Phylogeny reconstruction.

108 We estimated a phylogeny of *Scaptomyza*, including Hawaiian *Drosophila*, the sister clade  
109 of *Scaptomyza*, using 11 genes in 95 taxa (Table S1). We expanded a previous dataset [21] with  
110 five additional taxa: two with sequenced genetic markers, *S. nr. nigrita* (Nevada) and *S. montana*  
111 (Arizona) [22], and three obtained in this study from California, *S. nr. nigrita*, *S. montana*, and an  
112 undescribed species. DNA extraction and PCR methods were described previously [23]. PCR  
113 amplicons were cleaned and Sanger sequenced in both directions at the UC Berkeley Sequencing  
114 Facility, trimmed and manually aligned to the other taxa [21] in Geneious v.10.0.5. We estimated  
115 a species tree by maximum likelihood (ML) in RAxML [24], and a time-calibrated species tree by  
116 Bayesian inference using MrBayes v.3.2.4 [25] and BEAST v.2.4.6 [26]. Alignment partitioning  
117 and model implementation are described in the Supplementary Methods. Complete phylogenies  
118 are reported in Fig. S1 and S2.

### 119 (b) Ovipositor trait evolution.

120 To test whether ovipositor bristle number changed significantly during the evolution of  
121 herbivory, we performed PGLS [27] on ovipositor bristle number, accounting for larval diet [23]  
122 and phylogenetic relatedness. We collected bristle counts from illustrations or images from the  
123 literature, or from wild or lab-reared individuals (Table S2). Because distinguishing between  
124 bristle types was not always clear, we counted all bristles, regardless of morphology, position, or  
125 size, on an oviscapt, averaging across multiple literature sources if available. Ovipositors of wild  
126 and lab-reared flies ( $n \leq 10$  per species) were mounted onto slides with Permount mounting  
127 medium (Fisher Scientific) and coverslips. Ovipositors were photographed using an EOS Rebel  
128 T3i camera (Canon) mounted on a Stemi 508 stereo microscope (Zeiss) with a 1000  $\mu\text{m}$  scale bar.

129 PGLS regression was performed using ape [28] and picante [29] packages in R. Models of  
130 trait evolution (Brownian motion, Ornstein–Uhlenbeck, Early Burst, and white noise) for bristle  
131 number were compared using AICc in the geiger R package [30], and Brownian motion was  
132 selected as the best fit (Table S3). The degree of phylogenetic signal in the residuals was estimated  
133 using Pagel’s lambda ( $\lambda$ ) [31]. To visualize correlated evolutionary changes in diet and bristle  
134 number, ASR of both traits were estimated by ML using phytools [32] and ape [28] and mapped  
135 onto the phylogeny. Models of trait evolution (equal rates, symmetric, and all rates different) for  
136 larval diet were compared, and equal rates was selected as the best fit (Table S4).

137 To investigate whether ovipositor length and/or body size influences ovipositor bristle  
138 number, bristle number was linearly regressed against ovipositor and thorax length (proxy for body  
139 size). We used an expanded set of taxa included in a published dataset from [33] where all three  
140 measurements were taken consistently across 67 species, supplemented with direct measurements  
141 from four additional species (Table S5). Ovipositor bristle counts were averaged across oviscapt

142 and across individuals within a species. Individuals were excluded if only a subset of bristles were  
143 counted.

144 (c) Mapping population and measurements for pool-GWAS.

145 To identify specific genetic polymorphisms contributing to variation in bristle number, we  
146 used a pool-GWAS to detect allele frequency differences between pools of individuals with  
147 extreme phenotypes from the same population. Two *S. flava* outbred laboratory populations were  
148 founded from larvae collected from mustard plants, one individual per plant, near Dover, New  
149 Hampshire, USA: 79 larvae from *Turritis glabra* (referred to as “NH1”) and 58 from *T. glabra*  
150 and *Barbarea vulgaris* (“NH2”). After eclosion, adults were transferred to one mesh cage per  
151 population, containing *Arabidopsis thaliana* (Col-0 accession). Over 200 F1 offspring per  
152 population were reared on a mixture of *T. glabra* and *B. vulgaris*, and adult female F2 offspring  
153 were preserved in 95% ethanol and phenotyped for GWAS.

154 Ovipositors were mounted on slides as described above. Bristles were counted along the  
155 ventral edge (Fig. 3a), excluding largely invariable apical bristles. We quantified ovipositor length  
156 and wing chord (proxy for body size) using ImageJ. Wing chord was measured from the base to  
157 the wing apex following the third longitudinal vein (Fig. 3a). Two independent measurements were  
158 averaged per specimen. Linear regression analyses in a pilot experiment (N = 100, NH1 and NH2  
159 flies) revealed that bristle number was positively correlated with ovipositor length ( $B = 0.097$  [S.E.  
160 = 0.025] pegs per  $\mu\text{m}$  length,  $R^2 = 0.134$ ,  $P = 0.0001$ ), but not wing length ( $B = 0.001$  [S.E. =  
161 0.002],  $P = 0.25$ ). We therefore quantified both ovipositor length and bristle number for all  
162 individuals (NH1, N = 308 flies; NH2, N = 422 flies).

163 Narrow-sense heritability of ovipositor length and bristle number were quantified using  
164 mother-daughter regression; further details are presented in the Supplemental Methods.

165 (d) Pooled genome sequencing.

166 Flies in the NH1 and NH2 populations were split into two phenotypically extreme pools  
167 per population (four pools: NH1-low, NH2-low, NH1-high, NH2-high), composed of 60-85  
168 females in either the upper or lower 20% tail of the distribution of residual bristle number. Residual  
169 bristle number was determined through a linear regression of ovipositor bristle number against  
170 ovipositor length using the *lm* function in R. Flies were homogenized with a stainless-steel bead  
171 and TissueLyser (Qiagen). Genomic DNA was extracted using a DNeasy Blood and Tissue Kit  
172 (Qiagen). One Illumina library per pool was constructed with 100 bp paired-end reads and a 350  
173 bp insert size, and each library was sequenced on one half lane on an Illumina HiSeq 2500 at  
174 Arizona State University.

175 (e) Read mapping, pool-GWAS and gene ontology enrichment analysis.

176 Reads were mapped to the *S. flava* reference genome (GenBank accession no.  
177 GCA\_003952975.1) and filtered following best practices for pooled genome sequencing [34].  
178 Statistical significance of between-pool allele frequency differences per site was estimated using  
179 the Cochran-Mantel-Haenszel test [35]. See Supplemental Methods for further details. To identify  
180 genes located in or near the top SNPs, ranked by *p* value, we viewed the *S. flava* genome assembly  
181 and gene annotations [11] in Geneious v.10.2.6 and located the nearest annotated gene in either  
182 direction from the SNP. We checked for unannotated genes between the SNP and closest annotated  
183 gene by comparing the spanning sequence against the *D. melanogaster* RefSeq protein database,  
184 using NCBI BLASTx with default settings. Information on gene function was collected from the  
185 Gene Summary, Gene Ontology Annotations, and linked publications in Flybase (release 2020\_01)  
186 [36]. To aid in interpretation of the pool-GWAS results, we profiled linkage disequilibrium (LD)



187 in a wild population of *S. flava* near the NH1/NH2 collection locality. Further details are presented  
188 in the Supplementary Methods.

189 To determine if any predicted functions were overrepresented among genes intersecting  
190 the top associations, we performed a Gene Ontology enrichment test using GOWINDA, which  
191 implements a permutation-based approach tailored to the properties of GWAS datasets [37]. Full  
192 details, including orthology-based functional annotation and extension of gene models to capture  
193 regulatory regions, are described in the Supplemental Methods.

194 (f) Replicating pool-GWAS association for a candidate SNP.

195 Pool-GWAS can be confounded by uneven contributions of individuals to pools and biases  
196 in sequencing and read mapping. To replicate our pool-GWAS results using an approach robust to  
197 these confounding factors, we genotyped individuals at one of the top SNPs and estimated its effect  
198 size (Fig. 3g; Table S6). The SNP was chosen because of its position upstream of *G alpha i subunit*  
199 (*Gai*), a gene involved in asymmetric cell division of sensory organ precursor (SOP) cells from  
200 which bristles are derived [38]. Ovipositor bristle number and length were measured as described  
201 above. Genomic DNA was extracted from 74 females from NH1 and NH2 mapping populations,  
202 and a target region of 500bp around the SNP was Sanger-sequenced. Additional details are  
203 presented in the Supplementary Methods.

204 Bristle number was modeled in a generalized linear model, assuming an additive effect of  
205 the major allele, using the *lm* function in R. The model accounted for collection locality, lab-  
206 rearing host plant species, ovipositor length, and whether they were included in the high or low  
207 bristle number pools (to account for polygenic effects of the genomic background). Effect size ( $\beta$ )  
208 was estimated as the shift in bristle number (in standard deviations) expected from a single allelic  
209 substitution. A second model tested the effects of these factors on ovipositor length.

210 Pairwise measures of LD between the SNP and other variant sites (minimum frequency  
211  $>0.05$ ) were calculated using the *LD2* function from the *pegas* package in R [28]. Correlation  
212 among alleles is given by  $\delta$  [39] with strong LD indicated by  $|\delta| > 0.5$  ( $p$  value  $< 0.01$ ).

213

## 214 Results

215 (a) The evolution of herbivory coincided with an increase in ovipositor bristle number.

216 PGLS methods revealed that ovipositor bristle number is strongly influenced by larval diet  
217 ( $F_1, 1=4.33, P=0.05$ ) and phylogenetic relatedness (Pagel's  $\lambda = 1$ ) (Table S7). Ancestral state  
218 reconstructions of bristle number and larval diet similarly suggest that ovipositor bristle number  
219 increased coincident with the evolution of herbivory in *Scaptomyza*, estimated  $\sim 10.4$  million years  
220 ago (mya) (8.2 -13 mya, 95% highest probability density) (Fig. 2a; Fig. S3). Relative to  
221 interspecific differences, variation within species is low (Fig. 2b).

222 The increase in ovipositor bristle number in herbivorous *Scaptomyza* is likely to reflect  
223 increased bristle density, rather than increased ovipositor or body size. Regressing bristle number  
224 onto ovipositor length and female thorax length (a proxy for body size), we found that while bristle  
225 number is strongly predicted by ovipositor length across drosophilid species ( $\beta = 0.53, t(53) = 4.3,$   
226  $P < 0.001$ , adjusted  $R^2 = 0.47$ ; Fig. 2c, Table S8), the herbivorous species *S. flava* has proportionally  
227 more ovipositor bristles relative to ovipositor length than non-herbivorous species (highest residual  
228 value; Fig. S4). Further, ovipositor bristle number was not strongly predicted by thorax length ( $\beta$   
229  $= 0.24, t(53) = 1.9, P = 0.06$ ).

230 (b) GWAS on ventral ovipositor bristle number.

231 Variation in ovipositor bristle number was normally distributed in the NH1 and NH2  
232 outbred laboratory populations of *S. flava* (Fig. 3a-b), typical of a quantitative trait controlled by

233 multiple loci. Linear regression of ovipositor bristle number from mother-daughter pairs,  
234 controlling for the effect of ovipositor length, revealed that additive genetic variation accounted  
235 for roughly half of this phenotypic variation ( $P = 0.034$ ,  $h^2 = 0.50 \pm 0.27$  SE; Fig. 3c). By contrast,  
236 variation in ovipositor length was not heritable ( $P = 0.31$ ).

237 We sought to characterize the genomic architecture underlying this variation using a pool-  
238 GWAS. Because ovipositor length was correlated with bristle number (Fig. 3d), low and high  
239 bristle number pools were constructed with bristle number adjusted relative to that expected from  
240 ovipositor length (Fig. 3e). Our pool-GWAS approach should therefore interrogate bristle number  
241 independently of ovipositor size, while also minimizing noise introduced by non-heritable  
242 variation in ovipositor length that could otherwise impede GWAS. Whole genome re-sequencing  
243 of the four pools were mapped to the *S. flava* genome, resulting in a mean experiment-wide  
244 coverage depth of 166X per polymorphic site. After excluding low frequency variants (1.6 million  
245 SNPs remaining), we found an excess of SNPs with significantly differentiated allele frequencies  
246 among high and low bristle number pools (Fig. 4a), with 5 and 19 significant SNPs at 5% and 10%  
247 false discovery rate (FDR) cutoffs, respectively (Table 1; Table S9). Because LD decays in *S. flava*  
248 at a rapid rate similar to that seen in *D. melanogaster* (Fig. 4b), SNPs showing the strongest  
249 associations are likely in close proximity to causal polymorphisms or are causal themselves.

250 Many of the top SNPs (Table S9), including those reaching genome-wide significance  
251 ( $FDR \leq 0.05$ , Table 1), were located near genes involved in neural development or neural cell fate  
252 specification (i.e. *G protein alpha i subunit*, *sloppy paired 2*, *tenascin accessory*), cytoskeleton  
253 organization (i.e. *muscle-specific protein*), and cuticle development (i.e. *cuticular protein 11B*).

254 (c) Gene ontology enrichment analysis on candidate SNPs.

255 To gain insight into developmental and physiological mechanisms that may contribute to  
256 variation in ovipositor bristle number, we tested for enriched gene ontology (GO) annotations  
257 among genes intersecting SNPs with the strongest pool-GWAS associations (top 0.1% and 0.005%  
258 of  $P$ -values genome-wide). Using a restricted set of GO terms to minimize redundancy, we  
259 uncovered a single enriched term: RNA polymerase II-specific DNA-binding transcription  
260 repressor activity (GO:0001227; Table 2). Transcriptional repressors fine-tune gene expression  
261 levels during the specification of cell fate during development [40]. Notably, the strongest pool-  
262 GWAS association among transcriptional repressors falls in the *S. flava* gene orthologous to *hairy*  
263 (*h*) in *D. melanogaster* (Table S10), which functions in the establishment of bristle precursor  
264 positioning from within proneural clusters [41].

265 We further tested for enrichment using the exhaustive list of all GO terms. This approach  
266 imposes a conservative multiple testing burden, and no terms were enriched after applying a strict  
267 Bonferroni correction. However, two terms surpassed a nominal cutoff of  $P < 0.001$ , and both  
268 reflect broadly conserved developmental functions in eukaryotes: phosphatidylinositol (PI)  
269 biosynthetic process and establishment of cell polarity (Table 2). Many of the candidate genes  
270 annotated with PI biosynthetic process (GO:0006661) are kinases and transferases involved in  
271 production of PI derivatives (Table S10), which act as signaling molecules that regulate cellular  
272 growth and patterning [42–44]. Notably, establishment of cell polarity (GO:0030010) precedes the  
273 differentiation of sensory organ precursors into distinct neural cell types through asymmetric cell  
274 division [45]. *G protein  $\alpha$  i subunit* (*Gai*), one such gene involved in polarization and asymmetric  
275 division of neural cells [38], harbored one of the strongest pool-GWAS associations in our study,  
276 surpassing the 5% FDR threshold for genome-wide significance (Fig. 4c, Tables 1 and S8).

277 (d) Replication of a top candidate SNP from pool-GWAS.

278 To validate the pool-GWAS, we focused on a SNP in the 5' UTR of *Gai*, one of the  
279 strongest pool-GWAS associations. We phenotyped and genotyped individual adult females and  
280 recapitulated the pool-GWAS findings. Bristle number increased by 0.58 per major allele carried  
281 ( $\beta = 0.11$  standard deviations,  $t(68) = 2.88$ ,  $P < 0.005$ ; Fig. 4d; Table S11). This SNP explained  
282 9.5% of the total variance in bristle number (partial adjusted  $r^2$ ). As expected given our study  
283 design, the SNP did not have an effect on ovipositor length ( $\beta = 0.02$  standard deviations,  $t(69) =$   
284  $0.177$ ,  $P > 0.05$ ; Table S12). Out of 5 variant sites ( $\geq 0.05$  min. freq.) in the sequenced region, two  
285 were in strong LD with the focal SNP and were located upstream of *Gai*'s coding sequence or in  
286 an intronic region (Table S13). Further study will be necessary to identify the causal variant(s) in  
287 this region.

288

## 289 Discussion

290 The plant-penetrating ovipositor of herbivorous insects presents an excellent opportunity  
291 to study the evolution and genomic architecture of a complex trait, given its clear adaptive role in  
292 egg-laying and the quantitative nature of ovipositor morphological traits. We focused on the  
293 evolution of the ovipositor in the genus *Scaptomyza*, in which herbivory has evolved relatively  
294 recently, ca. 10.4 mya. The wealth of data from the *Drosophila* literature made our analyses  
295 possible: genitalic data from numerous taxa to investigate macroevolutionary shifts in bristle  
296 number, and knowledge of the genetics and development of bristle number in *D. melanogaster* to  
297 understand the genetic architecture underlying variation at the population level in *S. flava*.

298 From a macroevolutionary perspective, we found that ovipositor bristle number underwent  
299 a marked increase that coincided with the evolution of herbivory within *Scaptomyza*, a  
300 significantly larger shift than expected from the distribution of background rates of evolution

301 across the phylogeny (Fig. 2a). Surprisingly, we also found that ovipositor bristle number is an  
302 evolutionarily malleable trait, repeatedly increasing and decreasing across the phylogeny, with a  
303 five-fold range across *Scaptomyza*. High variability was similarly seen *within* species, with a 1.5-  
304 fold range in *S. flava*. The lack of strong evolutionary constraint over both macro- and  
305 microevolutionary timescales, along with availability of heritable standing genetic variation within  
306 populations, suggests that increased ovipositor bristle number is highly accessible to adaptive  
307 evolution. If these patterns hold in other Drosophilidae, the evolutionary malleability and  
308 accessibility of this trait may help explain why densely bristled ovipositors have convergently  
309 evolved across independent transitions to herbivory, such as the lineages that include *D. suzukii*  
310 and *S. notha*.

311 While the evolution of increased ovipositor length has been studied in *D. suzukii* as a key  
312 trait to facilitate cutting into ripe fruit [46], our phylogenetic analyses revealed that bristle number  
313 was still highest in herbivores even after accounting for ovipositor length (Fig. 2c, Fig. S4),  
314 suggesting that bristle number increased not simply as a result of ovipositor elongation, but from  
315 increased bristle density. Narrow sense heritability estimates of bristle number (adjusted for  
316 ovipositor length) in *S. flava* further showed that bristle number was heritable (Fig. 3c), while  
317 ovipositor length was not. Using ovipositor length-adjusted bristle counts, our GWAS thus  
318 targeted variation in bristle number and identified associated genetic variants contributing to this  
319 aspect of *S. flava*'s ovipositor.

320 Pinpointing the genetic changes that gave rise to adaptive traits that evolved millions of  
321 years ago can be difficult because genetic architectures may differ over short versus long  
322 timescales [47]. Still, GWAS can illuminate genes and gene functions that shape standing  
323 phenotypic variation and may contribute to evolution over longer timescales. Our GWAS on

324 ovipositor bristle number indicates that broadly conserved developmental genes and processes play  
325 a role in ovipositor bristle density. Genes encoding transcription repressor proteins were enriched  
326 near the strongest GWAS associations, and many top-scoring SNPs were located near genes with  
327 known roles in neural development, including *Gai* [38] and *slp2* [48]. This is consistent with our  
328 understanding that insect bristles are developmentally derived from single neural precursor cells  
329 (sensory organ precursors or SOPs) that differentiate through asymmetric cell divisions to generate  
330 mechanosensory and chemosensory neurons that innervate bristles and the cells that form their  
331 shaft, socket and sheath [49]. Innervation of ovipositor bristles has been demonstrated in flies,  
332 including in *D. melanogaster* [50]. Tinkering with genes involved in neural or SOP development  
333 could presumably lead to increased cell divisions specific to these SOP lineages to produce more  
334 bristles. In other *Drosophila* species, genes involved in neural development underlie differences  
335 in bristle number on male genitalia, sexcombs of the forelegs [51] and the thorax [52]. Specifically,  
336 *hairy* (*h*) was the top-scoring SNP within the GO category most over-represented in our strongest  
337 GWAS hits. This gene has been implicated in both within-species and between-species variation  
338 for several bristle traits in *D. melanogaster* and its close relatives [53,54]. RNAi knockdown of *h*  
339 in *Drosophila* has validated its involvement in male genital development, specifically clasper size  
340 and bristle number [54]. Intriguingly, *h* falls within a narrowly-mapped genomic region  
341 underpinning divergence in clasper bristle number among sister species of *Drosophila* [54]. Its  
342 role in bristle and genital development, along with its contribution to intra- and inter-species  
343 variation in bristle number, make *h* an excellent candidate for ovipositor bristle variation. It also  
344 highlights intriguing potential for genetic parallelism for variation in bristle number across the  
345 body, between sexes and across species.

346           Studies on the genetic architecture of adaptive traits have largely focused on monogenic,  
347 Mendelian traits with large effect sizes of candidate loci [55–57] with lower detection thresholds  
348 than genetically complex traits. Ovipositor bristle number represents a tractable quantitative trait  
349 for genetic dissection because of its meristic nature, high variability and heritability. Despite  
350 having a genetic basis similar to many quantitative traits – many small effect SNPs underlying  
351 variation – we still were able to detect a SNP with moderately large effect (validated by individual  
352 genotyping). Our results suggest that pool-GWAS can be a viable method for pinpointing genomic  
353 regions that underlie quantitative trait variation. Candidate SNPs can then be interrogated through  
354 functional experimentation to understand how alternative alleles influence cell division, size  
355 expansion, and reorganization during development [46]. Focusing on the developmental pathways,  
356 genes, and regulatory regions identified through our GWA mapping would offer a future route to  
357 illuminate how incremental changes could have created this key innovation in herbivorous insects.

358

359

## 360 Data accessibility

361 All data files and scripts were deposited in the Dryad  
362 Repository (<https://doi.org/10.6078/D1841H>). Sanger sequences for estimating the *Scaptomyza*  
363 phylogeny were uploaded to GenBank (MH938262-MH938270). Available at NCBI sequence  
364 read archive are Illumina sequences for the pool-GWAS (SRR11252387-SRR11252390), and to  
365 evaluate linkage disequilibrium (SRR15275350-SRR15275365). Sanger sequences for replicating  
366 the *Gai* SNP effect size were deposited on GenBank (MH884655-MH884734).

367



## 368 Funding

369 This work was supported by the National Institute of General Medical Sciences of the National  
370 Institute of Health (award number R35GM11981601) to NKW; the National Science Foundation  
371 (Graduate Research Fellowship, DGE 1752814 to JNP and DGE 1143953 to ADG, and Doctoral  
372 Dissertation Improvement Grant, DEB 1405966 to ADG); and a UC Berkeley Mentored Research  
373 Award to JNP.

374

## 375 Acknowledgements

376 We thank Mitchell Feldmann and Amelia White for caring for fly populations, Aaron Pomerantz  
377 for assistance imaging ovipositors, and Justin Lack for sharing advice and scripts for read mapping.  
378 We also thank Craig Miller, Kristin Scott, Michael Nachman, and Rasmus Nielsen for their  
379 feedback and advice.

380

## 381 Competing interests

382 We declare we have no competing interests.

383

384

385

386

387

388

389

## 390 References

- 391 1. Mitter C, Farrell B, Wiegmann B. 1988 The Phylogenetic Study of Adaptive Zones: Has  
392 Phytophagy Promoted Insect Diversification? *Am. Nat.* **132**, 107–128.
- 393 2. Wiens JJ, Lapoint RT, Whiteman NK. 2015 Herbivory increases diversification across  
394 insect clades. *Nat. Commun.* **6**, 8370.
- 395 3. Schoonhoven LM, Van Loon B, van Loon JJA, Dicke M. 2005 *Insect-Plant Biology*. OUP  
396 Oxford.
- 397 4. Southwood TRE. 1972 insect/plant relationship--an evolutionary perspective. *Roy Entomol*  
398 *Soc London Symp* **1972**, **6**.
- 399 5. Wiegmann BM *et al.* 2011 Episodic radiations in the fly tree of life. *Proc. Natl. Acad. Sci.*  
400 *U. S. A.* **108**, 5690–5695.
- 401 6. Marazzi B, Ané C, Simon MF, Delgado-Salinas A, Luckow M, Sanderson MJ. 2012  
402 Locating evolutionary precursors on a phylogenetic tree. *Evolution* **66**, 3918–3930.
- 403 7. Rabosky DL. 2017 Phylogenetic tests for evolutionary innovation: the problematic link  
404 between key innovations and exceptional diversification. *Philos. Trans. R. Soc. Lond. B*  
405 *Biol. Sci.* **372**. (doi:10.1098/rstb.2016.0417)
- 406 8. Eiseman C, Charney N, Carlson J. 2010 *Tracks & Sign of Insects & Other Invertebrates: A*  
407 *Guide to North American Species*. Stackpole Books.
- 408 9. Connor EF, Taverner MP. 1997 The Evolution and Adaptive Significance of the Leaf-  
409 Mining Habit. *Oikos* **79**, 6–25.
- 410 10. Atallah J, Teixeira L, Salazar R, Zaragoza G, Kopp A. 2014 The making of a pest: the  
411 evolution of a fruit-penetrating ovipositor in *Drosophila suzukii* and related species. *Proc.*  
412 *Biol. Sci.* **281**, 20132840.
- 413 11. Gloss AD *et al.* 2019 Evolution of herbivory remodels a *Drosophila* genome. *bioRxiv.* ,  
414 767160. (doi:10.1101/767160)
- 415 12. Thomson JA, Jackson MJ, Bock IR. 1982 Contrasting resource utilisation in two Australian  
416 species of *Drosophila* Fallen (Diptera) feeding on the bracken fern *Pteridium scopoli*. *Aust.*  
417 *J. Entomol.* **21**, 29–30.
- 418 13. Yassin A, Debat V, Bastide H, Gidaszewski N, David JR, Pool JE. 2016 Recurrent  
419 specialization on a toxic fruit in an island *Drosophila* population. *Proc. Natl. Acad. Sci. U. S.*  
420 *A.* **113**, 4771–4776.
- 421 14. Groen SC, Whiteman NK. 2016 Using *Drosophila* to study the evolution of herbivory and  
422 diet specialization. *Curr Opin Insect Sci* **14**, 66–72.

- 423 15. Kim BY *et al.* 2021 Highly contiguous assemblies of 101 drosophilid genomes. *Elife* **10**.  
424 (doi:10.7554/eLife.66405)
- 425 16. Shakeel M, He XZ, Martin NA, Hanan A, Wang Q. 2009 Diurnal periodicity of adult  
426 eclosion mating and oviposition of the european leafminer *Scaptomyza flava* (Falln)(Diptera  
427 Drosophilidae). *N. Z. Plant Prot.* **62**, 80–85.
- 428 17. Martin N. 2014 *Scaptomyza* (*Bunostoma*) *flavella* (Diptera: Drosophilidae) and the  
429 evolution of leaf mining. *I* **47**, 8–11.
- 430 18. Norga KK *et al.* 2003 Quantitative analysis of bristle number in *Drosophila* mutants  
431 identifies genes involved in neural development. *Curr. Biol.* **13**, 1388–1396.
- 432 19. Sham P, Bader JS, Craig I, O’Donovan M, Owen M. 2002 DNA Pooling: a tool for large-  
433 scale association studies. *Nat. Rev. Genet.* **3**, 862–871.
- 434 20. Bastide H, Betancourt A, Nolte V, Tobler R, Stöbe P, Futschik A, Schlötterer C. 2013 A  
435 genome-wide, fine-scale map of natural pigmentation variation in *Drosophila melanogaster*.  
436 *PLoS Genet.* **9**, e1003534.
- 437 21. Katoh T, Izumitani HF, Yamashita S, Watada M. 2017 Multiple origins of Hawaiian  
438 drosophilids: phylogeography of *Scaptomyza hardy* (Diptera: Drosophilidae). *Entomol. Sci.*  
439 **20**, 33–44.
- 440 22. Gloss AD *et al.* 2014 Evolution in an ancient detoxification pathway is coupled with a  
441 transition to herbivory in the drosophilidae. *Mol. Biol. Evol.* **31**, 2441–2456.
- 442 23. Lapoint RT, O’Grady PM, Whiteman NK. 2013 Diversification and dispersal of the  
443 Hawaiian Drosophilidae: the evolution of *Scaptomyza*. *Mol. Phylogenet. Evol.* **69**, 95–108.
- 444 24. Stamatakis A. 2006 RAxML-VI-HPC: maximum likelihood-based phylogenetic analyses  
445 with thousands of taxa and mixed models. *Bioinformatics* **22**, 2688–2690.
- 446 25. Ronquist F, Huelsenbeck JP. 2003 MrBayes 3: Bayesian phylogenetic inference under  
447 mixed models. *Bioinformatics* **19**, 1572–1574.
- 448 26. Bouckaert R, Heled J, Kühnert D, Vaughan T, Wu C-H, Xie D, Suchard MA, Rambaut A,  
449 Drummond AJ. 2014 BEAST 2: a software platform for Bayesian evolutionary analysis.  
450 *PLoS Comput. Biol.* **10**, e1003537.
- 451 27. Butler MA, King AA. 2004 Phylogenetic Comparative Analysis: A Modeling Approach for  
452 Adaptive Evolution. *Am. Nat.* **164**, 683–695.
- 453 28. Paradis E, Claude J, Strimmer K. 2004 APE: Analyses of Phylogenetics and Evolution in R  
454 language. *Bioinformatics.* **20**, 289–290. (doi:10.1093/bioinformatics/btg412)
- 455 29. Kembel SW, Cowan PD, Helmus MR, Cornwell WK, Morlon H, Ackerly DD, Blomberg  
456 SP, Webb CO. 2010 Picante: R tools for integrating phylogenies and ecology.  
457 *Bioinformatics* **26**, 1463–1464.

- 458 30. Harmon LJ, Weir JT, Brock CD, Glor RE, Challenger W. 2008 GEIGER: investigating  
459 evolutionary radiations. *Bioinformatics* **24**, 129–131.
- 460 31. Pagel M. 1999 Inferring the historical patterns of biological evolution. *Nature* **401**, 877–884.
- 461 32. Revell LJ. 2012 phytools: an R package for phylogenetic comparative biology (and other  
462 things). *Methods Ecol. Evol.* **3**, 217–223.
- 463 33. Craddock EM, Kambysellis MP, Franchi L, Francisco P, Grey M, Hutchinson A, Nanhoo S,  
464 Antar S. 2018 Ultrastructural variation and adaptive evolution of the ovipositor in the  
465 endemic Hawaiian Drosophilidae. *J. Morphol.* **279**, 1725–1752.
- 466 34. Schlötterer C, Tobler R, Kofler R, Nolte V. 2014 Sequencing pools of individuals—mining  
467 genome-wide polymorphism data without big funding. *Nat. Rev. Genet.* **15**, 749–763.
- 468 35. Kofler R, Pandey RV, Schlötterer C. 2011 PoPoolation2: identifying differentiation between  
469 populations using sequencing of pooled DNA samples (Pool-Seq). *Bioinformatics* **27**, 3435–  
470 3436.
- 471 36. Thurmond J *et al.* 2019 FlyBase 2.0: the next generation. *Nucleic Acids Res.* **47**, D759–  
472 D765.
- 473 37. Kofler R, Schlötterer C. 2012 Gowinda: unbiased analysis of gene set enrichment for  
474 genome-wide association studies. *Bioinformatics* **28**, 2084–2085.
- 475 38. Schaefer M, Petronczki M, Dorner D, Forte M, Knoblich JA. 2001 Heterotrimeric G  
476 proteins direct two modes of asymmetric cell division in the Drosophila nervous system.  
477 *Cell* **107**, 183–194.
- 478 39. Schaid DJ. 2004 Evaluating associations of haplotypes with traits. *Genet. Epidemiol.* **27**,  
479 348–364.
- 480 40. Reynolds N, O’Shaughnessy A, Hendrich B. 2013 Transcriptional repressors: multifaceted  
481 regulators of gene expression. *Development* **140**, 505–512.
- 482 41. Usui K, Goldstone C, Gibert J-M, Simpson P. 2008 Redundant mechanisms mediate bristle  
483 patterning on the Drosophila thorax. *Proc. Natl. Acad. Sci. U. S. A.* **105**, 20112–20117.
- 484 42. Balakrishnan SS, Basu U, Raghu P. 2015 Phosphoinositide signalling in Drosophila.  
485 *Biochim. Biophys. Acta* **1851**, 770–784.
- 486 43. Janardan V, Sharma S, Basu U, Raghu P. 2020 A Genetic Screen in Drosophila To Identify  
487 Novel Regulation of Cell Growth by Phosphoinositide Signaling. *G3* **10**, 57–67.
- 488 44. Hassan BA, Prokopenko SN, Breuer S, Zhang B, Paululat A, Bellen HJ. 1998 skittles, a  
489 Drosophila phosphatidylinositol 4-phosphate 5-kinase, is required for cell viability, germline  
490 development and bristle morphology, but not for neurotransmitter release. *Genetics* **150**,  
491 1527–1537.

- 492 45. Schweisguth F. 2015 Asymmetric cell division in the *Drosophila* bristle lineage: from the  
493 polarization of sensory organ precursor cells to Notch-mediated binary fate decision. *Wiley*  
494 *Interdisciplinary Reviews: Developmental Biology*. **4**, 299–309. (doi:10.1002/wdev.175)
- 495 46. Green JE, Cavey M, Médina Caturegli E, Aigouy B, Gompel N, Prud'homme B. 2019  
496 Evolution of Ovipositor Length in *Drosophila suzukii* Is Driven by Enhanced Cell Size  
497 Expansion and Anisotropic Tissue Reorganization. *Curr. Biol.* **29**, 2075–2082.e6.
- 498 47. Stern DL, Orgogozo V. 2008 The loci of evolution: how predictable is genetic evolution?  
499 *Evolution* **62**, 2155–2177.
- 500 48. Bhat KM, van Beers EH, Bhat P. 2000 Sloppy paired acts as the downstream target of  
501 wingless in the *Drosophila* CNS and interaction between sloppy paired and gooseberry  
502 inhibits sloppy paired during neurogenesis. *Development* **127**, 655–665.
- 503 49. Orgogozo V, Schweisguth F, Bellaïche Y. 2001 Lineage, cell polarity and inscuteable  
504 function in the peripheral nervous system of the *Drosophila* embryo. *Development* **128**, 631–  
505 643.
- 506 50. Taylor BJ. 1989 Sexually dimorphic neurons in the terminalia of *Drosophila melanogaster*:  
507 I. Development of sensory neurons in the genital disc during metamorphosis. *J. Neurogenet.*  
508 **5**, 173–192.
- 509 51. Nagy O *et al.* 2018 Correlated Evolution of Two Copulatory Organs via a Single cis-  
510 Regulatory Nucleotide Change. *Curr. Biol.* **28**, 3450–3457.e13.
- 511 52. Marcellini S, Simpson P. 2006 Two or four bristles: functional evolution of an enhancer of  
512 scute in *Drosophilidae*. *PLoS Biol.* **4**, e386.
- 513 53. Robin C, Lyman RF, Long AD, Langley CH, Mackay TFC. 2002 hairy: A quantitative trait  
514 locus for *drosophila* sensory bristle number. *Genetics* **162**, 155–164.
- 515 54. Hagen JFD *et al.* 2021 Unraveling the Genetic Basis for the Rapid Diversification of Male  
516 Genitalia between *Drosophila* Species. *Mol. Biol. Evol.* **38**, 437–448.
- 517 55. Lamichhaney S, Han F, Berglund J, Wang C, Almén MS, Webster MT, Grant BR, Grant  
518 PR, Andersson L. 2016 A beak size locus in Darwin's finches facilitated character  
519 displacement during a drought. *Science* **352**, 470–474.
- 520 56. Linnen CR, Kingsley EP, Jensen JD, Hoekstra HE. 2009 On the origin and spread of an  
521 adaptive allele in deer mice. *Science* **325**, 1095–1098.
- 522 57. Rost S *et al.* 2004 Mutations in VKORC1 cause warfarin resistance and multiple  
523 coagulation factor deficiency type 2. *Nature* **427**, 537–541.

524

525

526 Figures & Tables:

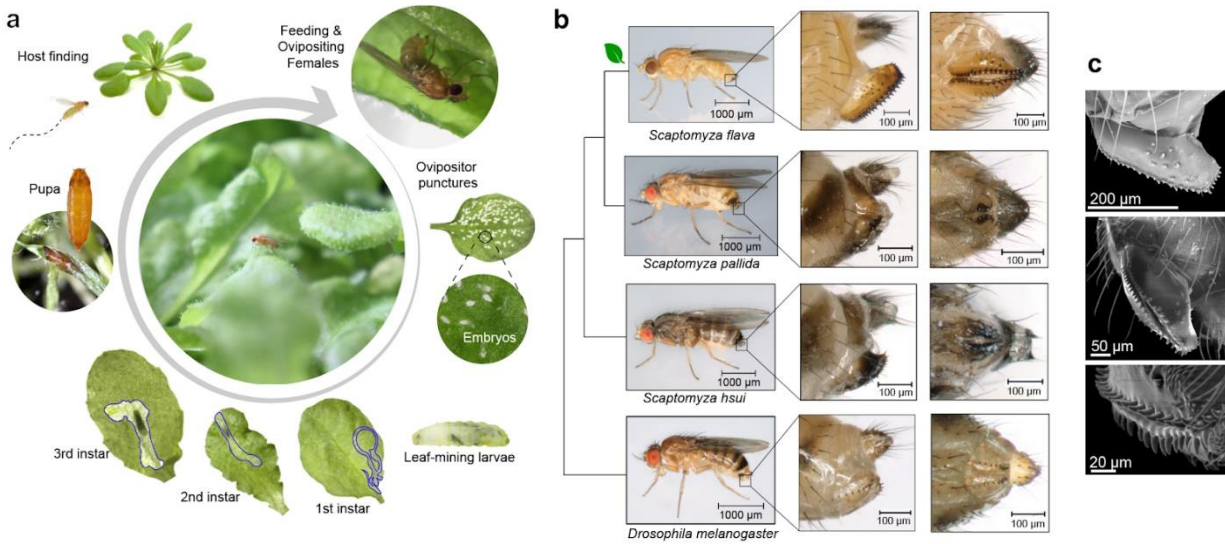

527

528 Figure 1.

529 **The morphology of the female ovipositor of the herbivorous drosophilid *Scaptomyza flava***  
530 **enables cutting into tough plant tissues.** (a) The life cycle of *S. flava* is strongly dependent on  
531 host plants for female nutrition and larval development. On the underside of an *Arabidopsis*  
532 *thaliana* leaf, a female uses her serrated ovipositor to scoop a leaf puncture for feeding and egg-  
533 laying. Larval mines outlined in blue. (b) Comparison of the ovipositors (insets) of herbivorous  
534 and non-herbivorous drosophilid species. (c) Scanning electron micrographs of the ovipositor of  
535 *S. flava*.

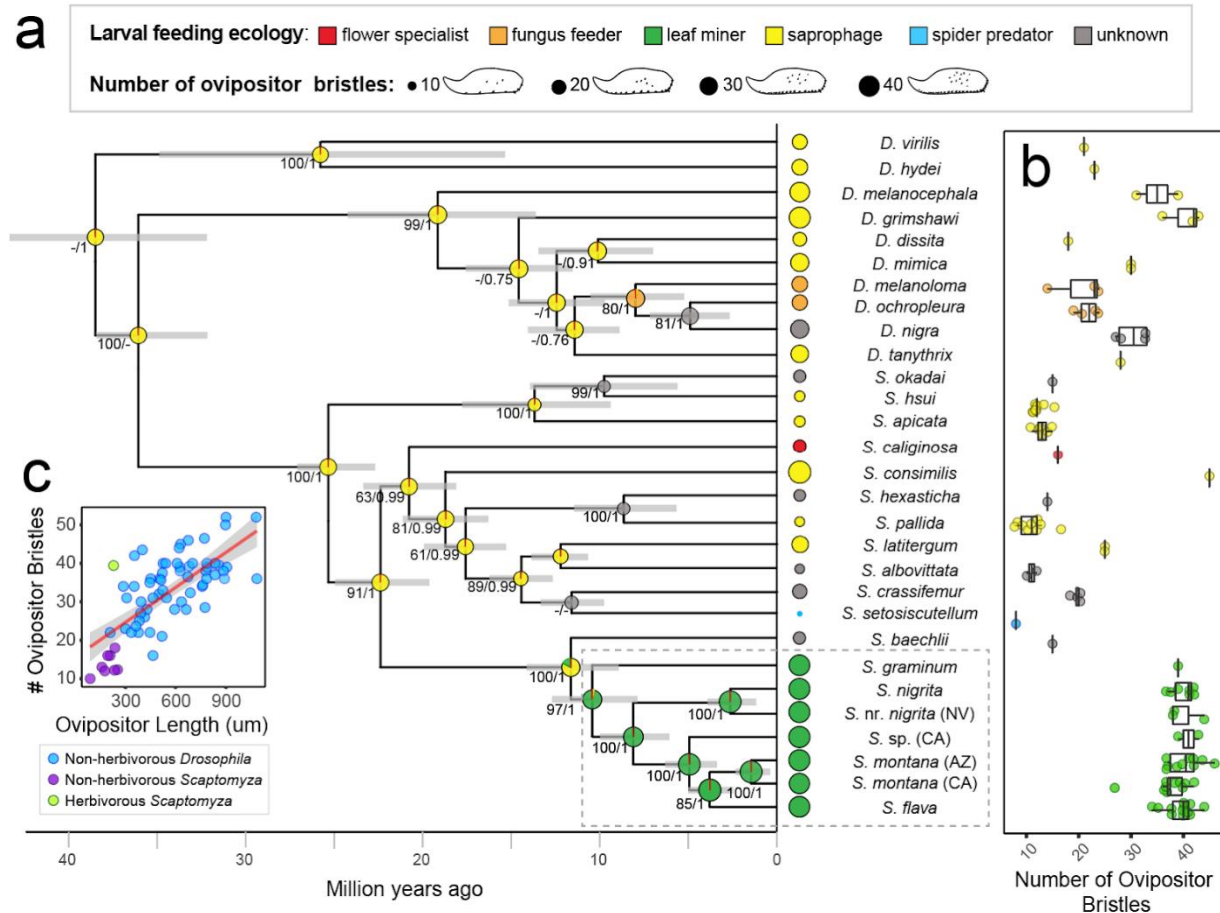

536

537 Figure 2.

538 **The evolution of herbivory within *Scaptomyza* coincides with an increase in ovipositor bristle**

539 **number.** (a) Time-calibrated phylogeny of herbivorous *Scaptomyza* and their non-herbivorous

540 relatives, based on ML and Bayesian analyses, using 11 genes and fossil and biogeographic time

541 calibrations. Branch support is indicated by ML bootstrap values ( $\geq 50\%$ ) and Bayesian posterior

542 probability ( $\geq 0.9$ ). Bars at nodes indicate 95% highest posterior density interval around the mean

543 node age. Pie graphs at nodes show probabilities of ancestral larval diets, and size represents

544 ancestral ovipositor bristle number (per oviscapt) estimated from ML ASR. Average bristle

545 number for extant species are shown at the tips, with individual counts shown in (b). (c) Scatterplot

546 of ovipositor bristle number as a function of ovipositor length.

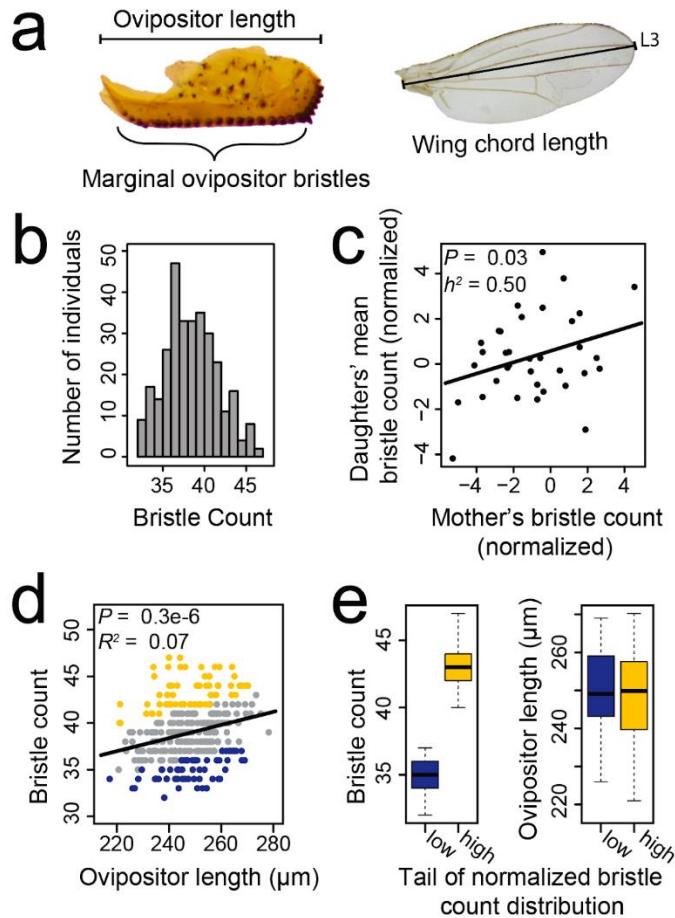

547

548 Figure 3.

549 **Variation in the number of plant-cutting ovipositor bristles is normally distributed and**

550 **heritable in *S. flava*, enabling quantitative genetic dissection.** (a) Ovipositor bristle counts

551 include those lining the ventral margin, summed across both oviscaps. Wing chord length was

552 measured along the third longitudinal vein (L3). Panels b, d, and e show phenotype distributions

553 used for the pool-GWAS in the NH1 outbred mapping population. (b) Ovipositor bristle number

554 follows a normal distribution. (c) Ovipositor bristle count, expressed as residuals from a linear

555 regression of bristle count against ovipositor length, is heritable in the narrow sense ( $h^2 = 0.50$ )

556 from mother-daughter regression analysis ( $N = 35$ ). (d) After regressing out the effect of ovipositor

557 length on bristle count, pools of phenotypically extreme individuals were constructed for genome



558 sequencing by combining individuals in the upper (yellow) or lower (blue) 20% tails of the  
559 distribution. (e) Individuals in the low pool had ~20% fewer bristles, but not statistically different  
560 ovipositor lengths, than those in the high pool.  
561

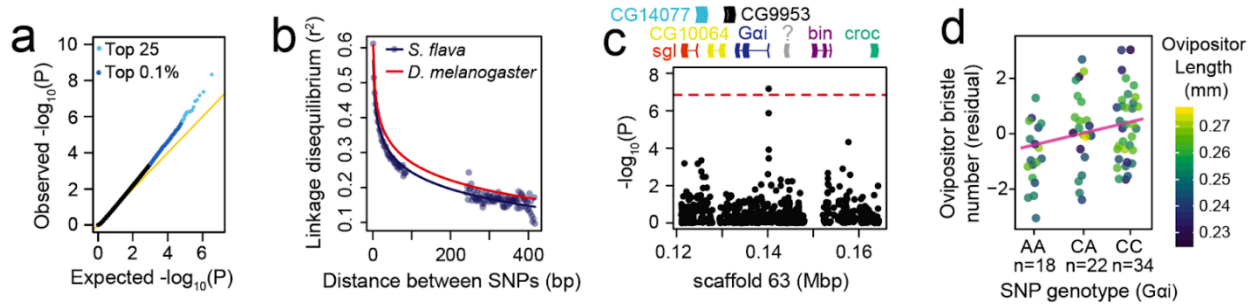

562

563 Figure 4.

564 **Pool-GWAS for variation in *S. flava* ovipositor bristle number implicates genes involved in**  
565 **nervous system development.** (a) An excess of strong *P*-values suggests an enrichment of true  
566 associations among the top scoring SNPs. (b) The relationship between physical distance and  
567 linkage disequilibrium, inferred from pooled sequencing of wild *S. flava*, is similar to that seen in  
568 *D. melanogaster*. (c) Manhattan plot centered on a top SNP upstream of *G-alpha i subunit (Gai)*,  
569 a gene that functions in nervous system development [38]. The red line indicates the 5% FDR  
570 cutoff for genome-wide significance. Annotated genes are plotted above; ambiguous orthology  
571 indicated by “?”. (d) Genotyping individuals for the SNP near *Gai* replicates the pool-GWAS  
572 result. Bristle number, expressed as residuals generated by subtracting predicted values based on  
573 covariates from observed values, increases additively with each major allele and independently of  
574 ovipositor length, shown by color scale. Regression line shown in pink.

575

576 Table 1.

577 **Top SNPs associated with variation in ovipositor bristle number are located in or near genes**  
 578 **involved in the development of bristles, cuticles, and the nervous system.** SNPs reaching  
 579 genome-wide significance ( $FDR \leq 0.05$ ) from the pool-GWAS are shown in descending *P*-value  
 580 ranking.

| P-value ranking | Scaffold [scaffold length] | Position on scaffold | P-value  | FDR q value | Nearby gene(s)                   | SNP location relative to gene | Gene function                                                                                                                                                     |
|-----------------|----------------------------|----------------------|----------|-------------|----------------------------------|-------------------------------|-------------------------------------------------------------------------------------------------------------------------------------------------------------------|
| 1               | scaffold00465 [104,011]    | 184                  | 4.66E-09 | 0.008       | <b>Muscle-specific protein</b>   | 453 bp downstream             | Actin binding; cytoskeleton organization; required for proper positioning of muscle nuclei, mitochondria, and neuromuscular junction                              |
| 2               | scaffold00015 [769,991]    | 186,025              | 4.3E-08  | 0.036       | <b>heavyweight</b>               | 8,623 bp downstream           | Predicted to have phosphotyrosine residue binding activity; polymorphisms associated with body mass and starvation resistance                                     |
|                 |                            |                      |          |             | <b>cuticular protein 11B</b>     | 1,625 bp downstream           | Chitin-based cuticle development                                                                                                                                  |
| 3               | scaffold00063 [441,164]    | 140,206              | 6.69E-08 | 0.037       | <b>G protein alpha i subunit</b> | 2 bp upstream                 | Asymmetric neuroblast division and asymmetric protein localization involved in cell fate determination; cytoskeleton organization; and nervous system development |
| 4               | scaffold00053 [434,434]    | 135,098              | 1.20E-07 | 0.048       | <b>sloppy paired 2</b>           | 560 bp upstream               | Transcription factor that regulates embryonic segment polarity and neural fate specification by temporal patterning of medulla neuroblasts                        |
|                 |                            |                      |          |             | <b>CG11018</b>                   | 1,809 bp upstream             | Unknown                                                                                                                                                           |
| 5               | scaffold00071 [361,359]    | 290,082              | 1.42E-07 | 0.048       | <b>CG32655</b>                   | 9,932 bp downstream           | Unknown                                                                                                                                                           |
|                 |                            |                      |          |             | <b>tenascin accessory</b>        | 42,315 bp downstream          | Nervous system development; regulation of cell-cell adhesion; and synapse organization                                                                            |

581 Note: SNPs with exceptionally high coverage (likely erroneous; 2 among top 25) were filtered.

582

583 Table 2.

584 **Gene ontology terms enriched among genes intersecting the most significant pool-GWAS**  
 585 **SNPs.**

| Candidate SNPs | GO Terms             |                                                                                                                    | Genes intersecting candidate SNPs |          |                       | Fold Enrichment | P       | P (Bonf.) | Genes intersecting candidate SNPs (named by orthology to <i>D. mel.</i> )                                   |
|----------------|----------------------|--------------------------------------------------------------------------------------------------------------------|-----------------------------------|----------|-----------------------|-----------------|---------|-----------|-------------------------------------------------------------------------------------------------------------|
|                | Investigated         | Enriched GO Term                                                                                                   | Observed                          | Expected | Possible <sup>a</sup> |                 |         |           |                                                                                                             |
| Top 0.1%       | Non-redundant subset | DNA-binding transcription repressor activity, RNA polymerase II-specific (Molecular Function, level 4; GO:0001227) | 16                                | 5.469    | 63                    | 2.93            | 0.00004 | 0.0092    | <i>aop, chn, dpn, E(sp)1mβ-HLH, E5, h, Hey, HHEX, l(2)gd1, lms, Mad, Med, Rbf2, CG12299, CG1233, CG7987</i> |
| Top 0.1%       | Full set             | phosphatidylinositol biosynthetic process (Biological Process, level 6; GO:0006661)                                | 8                                 | 2.013    | 43                    | 3.97            | 0.00067 | 1.00      | <i>GAA1, Pi3K68D, PIG-O, PIG-S, PIG-Z, PIP5K59B (x2), CG5342</i>                                            |
| Top 0.005%     | Full set             | establishment of cell polarity (Biological Process, level 3; GO:0030010)                                           | 5                                 | 0.751    | 92                    | 6.66            | 0.00075 | 1.00      | <i>Gai, Khc-73, scrib, skt1, CG5964</i>                                                                     |

586 <sup>a</sup> The maximum possible number of intersections equals the number of genes assigned to the GO category that have at least one genotyped SNP passing quality control filters.

587

588

589

## 590 Supplemental Methods:

591 **Alignment partitioning and model implementation for phylogeny reconstruction:** The  
592 concatenated alignment was partitioned by codon and gene, with ribosomal genes given single  
593 partitions. The ML analysis used a GTR+gamma model on all partitions. To evaluate consistency  
594 across runs, five independent runs were performed, with distinct starting seed. Each run included  
595 1,000 bootstrap replicates, and a slow ML search on every 5th tree. The phylogeny with the highest  
596 likelihood was used for ancestral character estimation. For the Bayesian analysis, models of  
597 sequence evolution were selected for each partition with the Akaike information criterion (AIC),  
598 using MrModeltest2 v.2.3 [1] and PAUP\* v.4.0a [2]. To infer a phylogeny and divergence times,  
599 a Markov-Chain Monte-Carlo (MCMC) analysis was performed as previously described using the  
600 same time calibrations points and run parameters [3]. To ensure that the Markov chain adequately  
601 converged to a stationary distribution, forty replicate runs of 10 million generations each were  
602 performed and implemented in BEAST v.2.4.6 [4] with BEAGLE [5] for multicore processing.  
603 The first ten percent of samples were discarded as burn-in. Trees were re-sampled every 250,000  
604 generations, and combined using LogCombiner v.2.4.6 [4]. Tracer v.1.6.0 [6] was used to confirm  
605 that ESS values were sufficient for reliable parameter estimates (ESS >200).

606

607 **Narrow-sense heritability estimates from mother-daughter regression:** Fifty single  
608 male-female pairs (virgin females) from the combined NH1 and NH2 colonies were individually  
609 mated on *T. glabra* in Magenta boxes (Sigma-Aldrich) with mesh covers. Each box was  
610 provisioned with a cotton ball soaked in 10% honey solution. For 35 mate pairs that produced  
611 daughters, ovipositor length and bristle number were profiled for every mother and at least one  
612 and up to four of her daughters (mean n = 3.4). To interrogate bristle number independently of

613 ovipositor length, we extracted residual bristle number from a linear regression of bristle number  
614 against ovipositor length; because the interaction between ovipositor length and generation  
615 (mother or daughters) was not significant, we included both generations in a single regression  
616 model. Narrow-sense heritability ( $h^2$ ) of residual ovipositor bristle number and ovipositor length  
617 – the proportion of phenotypic variation due to additive genetic effects – were each estimated by  
618 regressing the phenotype of each mother against the average phenotype of her daughters.  
619 Following convention when a trait can only be measured in parents of a single sex [7],  $h^2$  was  
620 defined as twice the slope of the parent-offspring regression. A one-tailed  $p$  value was used to test  
621 the hypothesis that  $h^2 > 0$ .

622

623 **Read mapping and pool-GWA.** Reads were trimmed using Trimmomatic v0.32 with the  
624 parameters “TRAILING:3 HEADCROP:2 SLIDINGWINDOW:6:15 MINLEN:50” and mapped  
625 to an *S. flava* reference genome assembly (GenBank accession no. GCA\_003952975.1) using bwa  
626 v0.7.12 [8–10] with the following parameters: for bwa aln, “-o 3 -d 15 -l 100”; for bwa sampe, “-  
627 a 1000”. PCR and optical duplicate reads were removed using Picard Tools v1.107  
628 (<http://picard.sourceforge.net>). Unpaired and low-quality reads were removed using the View  
629 command in Samtools v1.3.1 [11] with parameters “-q 20 -f 0x0002 -F 0x0004 -F 0x0008”. Low  
630 quality bases were removed using the Samtools mpileup command with parameters “-B -Q 17”.  
631 Repeat regions and 5 bp windows flanking indels (minimum count > 4) were filtered using  
632 Popoolation2 [12].

633 Statistical significance of allele frequency differences per site was estimated using the  
634 Cochran-Mantel-Haenszel test using Popoolation2 and custom scripts for sites with a minimum  
635 minor allele count of 10, coverage depth of 100, and minor allele frequency of 8% across all pools

636 combined, and a minimum coverage depth of 15 and maximum coverage depth 200 in each pool.

637 We observed and adjusted for a minor observed inflation of  $p$  values. Systematic inflation  
638 of GWAS test statistics (termed genomic inflation) -- which is typically assumed to arise due to  
639 unmodeled relatedness among individuals, biased test implementation, or errors in genotyping --  
640 can result in overly confident  $p$ -values. Genomic inflation is also expected to arise under polygenic  
641 control of a trait, even in the absence of population structure and other technical artefacts [13]. We  
642 identified and conservatively sought to correct for a slight inflation of  $p$ -values in our pool-GWA  
643 analysis [14]. However, because the distribution of  $p$ -values was non-uniform with an excess of  
644 both higher and lower values, typical corrections based on the observed vs. median test statistic  
645 gave unsuitable inflation factors. Following Thoen et al., we therefore regressed observed against  
646 expected  $-\log_{10}(P)$  values with the intercept constrained to 0, and divided each  $-\log_{10}(P)$  value by  
647 the slope of the regression line [15]. We excluded from our regression model the 1% most  
648 significant SNPs from our pool-GWAS (which are likely to be enriched for true associations) and  
649 SNPs that failed the stringent filtering described in our GO enrichment analysis (which may have  
650 overly conservative or liberal  $p$ -values due to biases or errors in genome assembly, sequencing and  
651 read mapping, and SNP genotyping, given the nature of our filters). Our approach for  $p$ -value  
652 adjustment was conservative, yielding a median  $p$ -value of 0.597.

653

654 **Linkage disequilibrium: Pooled genome sequencing.** A total of 45 *S. flava* larvae were  
655 collected from *Turritis* (formerly *Arabis*) *glabra* from a large field (~50,000 m<sup>2</sup>) in Belmont, MA,  
656 USA, which contained thousands of individual *T. glabra* plants with heavy *S. flava* mining  
657 damage, between June 22 and July 2, 2013. Each larva was collected from a separate plant  
658 individual to minimize relatedness. Samples were preserved in 95% ethanol at -80C. DNA was

659 extracted from the pool of larvae using a DNeasy Blood and Tissue Kit (Qiagen). 100 bp paired-  
660 end sequencing was conducted on half of a lane on an Illumina HiSeq 2500 at the University of  
661 Arizona in January 2014.

662 Read mapping. Reads were trimmed of adapters, and trimmed and filtered for quality with  
663 Trimmomatic v. 0.32 [8] using the following settings: ILLUMINACLIP:2:30:10, TRAILING:3,  
664 HEADCROP:2, SLIDINGWINDOW:6:15, and MINLEN:50. Retained reads were then mapped  
665 to the *S. flava* reference genome first with BWA v.0.6.1 [9] using the MEM algorithm, and then  
666 using Stampy v.1.0.23 [16] using the -bamkeepgood reads option. From an initial Stampy run  
667 using a subset of the data, the substitution rate was obtained with Stampy and the average insert  
668 size was obtained with Picard v.1.107 CollectInsertSizeMetrics, and these estimates were used as  
669 parameters when mapping the full read set. Resulting SAM files were converted to BAM files  
670 using SAMtools v.0.1.18 [11]. BAM files were cleaned and sorted using Picard CleanSam and  
671 SortSam, and duplicate reads were marked and removed using Picard MarkDuplicates.  
672 Realignment around indels was performed using GATK v.2.8-1 [17] RealignerTargetCreator and  
673 IndelRealigner. SAMTools was then used to remove unmapped reads, keep only properly mapped  
674 read pairs, and filter for a mapping quality of 20. BEDTools v.2.17.0 [18] intersect was used to  
675 filter out repetitive regions, identified using the Drosophila repeat library in RepeatMasker v4.0.5.  
676 Reads were mapped to a mean coverage depth of 31.4x across the *S. flava* genome.

677 Linkage Disequilibrium estimates. LD was estimated from the 15 largest autosomal  
678 scaffolds. SNPs were called using GATK v.2.8-1 [17] UnifiedGenotyper with heterozygosity of  
679 0.014, ploidy level of 90, two maximum alternative alleles, and a maximum coverage of 200.  
680 Preliminary SNPs were then hard filtered using GATK v.2.8-1 VariantFiltration and  
681 SelectVariants. LDx [19] was used to obtain a maximum likelihood estimate of linkage

682 disequilibrium ( $r^2$ ) with the following parameters: a minimum read depth of 10, a maximum read  
683 depth of 150, an insert size of 417, a minimum quality score of 20, a minimum minor allele  
684 frequency of 0.1, and a minimum read intersection depth of 11.

685

686 **Gene ontology enrichment analysis on candidate SNPs:** To test whether genes intersecting  
687 the top GWAS associations were enriched for particular predicted functions, we assigned  
688 functional annotations using orthology relationships among protein-coding genes in *S. flava* and  
689 other *Drosophila* genomes. Orthology was inferred by similarity clustering using orthoMCL  
690 v2.0.9 [20], with default parameters and an inflation value of 1.5, among proteomes for *S. flava*,  
691 all *Drosophila* species from the Drosophila 12 Genomes Consortium [21] (retrieved from FlyBase  
692 release 2013\_06) except *D. willistoni*, and a draft genome assembly of *S. pallida* (unpublished  
693 data). Each *S. flava* gene was then annotated with the gene ontology (GO) terms assigned to its  
694 predicted ortholog(s) in *D. melanogaster* in FlyBase (release 2020\_02). Parental GO terms that  
695 were implied but not directly listed, which were necessary for downstream analyses, were retrieved  
696 using GO.db v3.7.0 [22,23].

697 We used GOWINDA [24] to test for enrichments of gene ontology (GO) terms among the  
698 genes that intersected SNPs with the strongest pool-GWAS associations (top 0.1% and 0.005% of  
699 p-values). We conservatively assumed that SNPs within the same gene were in LD and thus were  
700 not independent associations (--mode gene), and significance was determined from one million  
701 permutations. All gene models were extended by 200 bp (--gene-definition updownstream200) to  
702 account for the fact that genotyped SNPs may tag non-genotyped causal variants that are proximal,  
703 but the rapid decay of LD in *S. flava* (Fig. 4b) makes this unlikely over long physical distances.  
704 To capture both protein-coding and regulatory effects, SNPs were assigned to a given gene if they

705 fell within its exons, introns, or the adjacent upstream or downstream intergenic region. Intergenic  
706 regions were extended from a focal gene's UTR boundary until reaching the boundary of the  
707 adjacent gene's UTR, up to a maximum of 2 kb. Intergenic regions were included because most  
708 cis-regulatory elements in *D. melanogaster* are located within or adjacent to the genes they  
709 regulate, but are rarely separated by an intervening gene [25]. To avoid diluting statistical power  
710 by the inclusion of redundant, nested GO terms or terms with few member genes, terms were only  
711 considered if they were assigned to at least 20 genes in *S. flava*, and we focused on only a single  
712 level of the GO hierarchy (where level refers to the number of edges from the focal GO term to  
713 the root of the acyclic graph of GO term relationships). Level two was used for Molecular  
714 Function, which maximized the number of terms considered, and level four was used for  
715 Biological Process because it contained a similar number of terms.

716 Prior to GO enrichment analyses, we performed a more stringent SNP filtering step,  
717 excluding tri-allelic sites (having a frequency > 0.08 for the third most common allele) and SNPs  
718 located within 300 bp of a scaffold edge.

719  
720 **Replication of a candidate SNP upstream of *Gai*:** DNA was extracted from whole adult flies  
721 with the Qiagen DNeasy blood and tissue kit, following the provided protocol. PCR primers for  
722 the *Gai* region were designed in Geneious, using default settings and a target region size of 500bp.  
723 The primer sequences are as follows: gai4F: CATTCTGTCCATGGCGTCG; gai9R:  
724 GCCGTTAGACAAAGCGCATT. PCR methods were the same as those in Gloss et al. (2013).  
725 PCR clean up and sequencing were performed at the UC Berkeley DNA Sequencing Facility.

726 For trimming, alignment, and base calling, we used Geneious v.10.0.5 (Biomatters Ltd.)  
727 Using the Trimming Tool in Geneious, regions with more than a 5% chance of an error per base



728 were trimmed. Sequences were aligned with default “Geneious Alignment” setting (Cost matrix:  
729 65% similarity, Gap open penalty: 12, Gap extension penalty: 3, Refinement Iterations: 2,  
730 Alignment type: Global alignment with free end gaps). The final alignment was 331 base pairs  
731 long. A significant fraction of sequences had convoluted regions upstream of the SNP, likely due  
732 to heterozygous indels. Manual base-calling was therefore performed on all sequences. Double  
733 peaks were called as heterozygotes. Sequences with convoluted regions were analyzed with  
734 Indelligent v.1.2, which identified indels [26]. In these cases, most of the reverse strand sequence  
735 was rendered unreadable, so all sequences (convoluted or not) were based on only forward strand  
736 nucleotide base calls. Variant sites, including the candidate SNP, were identified in Geneious,  
737 using a minimum variant frequency cutoff of 0.05.

738         We performed a test for Hardy-Weinberg equilibrium (HWE) for the focal SNP among all  
739 individuals using the *hw.test* function from the *pegas* package. The SNP was found to be in HWE  
740 ( $\chi^2 = 3.15$ ,  $P > 0.05$ ).

741

742

743

744

745

746

747

748 **Supplemental Figures:**

749 **Figure S1 – Bayesian tree.**

750 **Time calibrated phylogeny of subgenus *Drosophila* and *Scaptomyza* inferred from Bayesian**  
 751 **analysis**, using 11 genes (16S, 28S, *Adh*, *Cad-r* (rudimentary), *COI*, *COII*, *gstd1*, *gpdh*, *marf*, *ND2*,  
 752 *n(l)tid*, *Orco*) and fossil and biogeographic time calibrations. Nodes indicate posterior  
 753 probabilities, red bars represent 95% highest posterior density interval around the mean node age.  
 754 Illustrations of female ovipositors, indicating bristle number, were drawn from sources indicated  
 755 in Table S1.

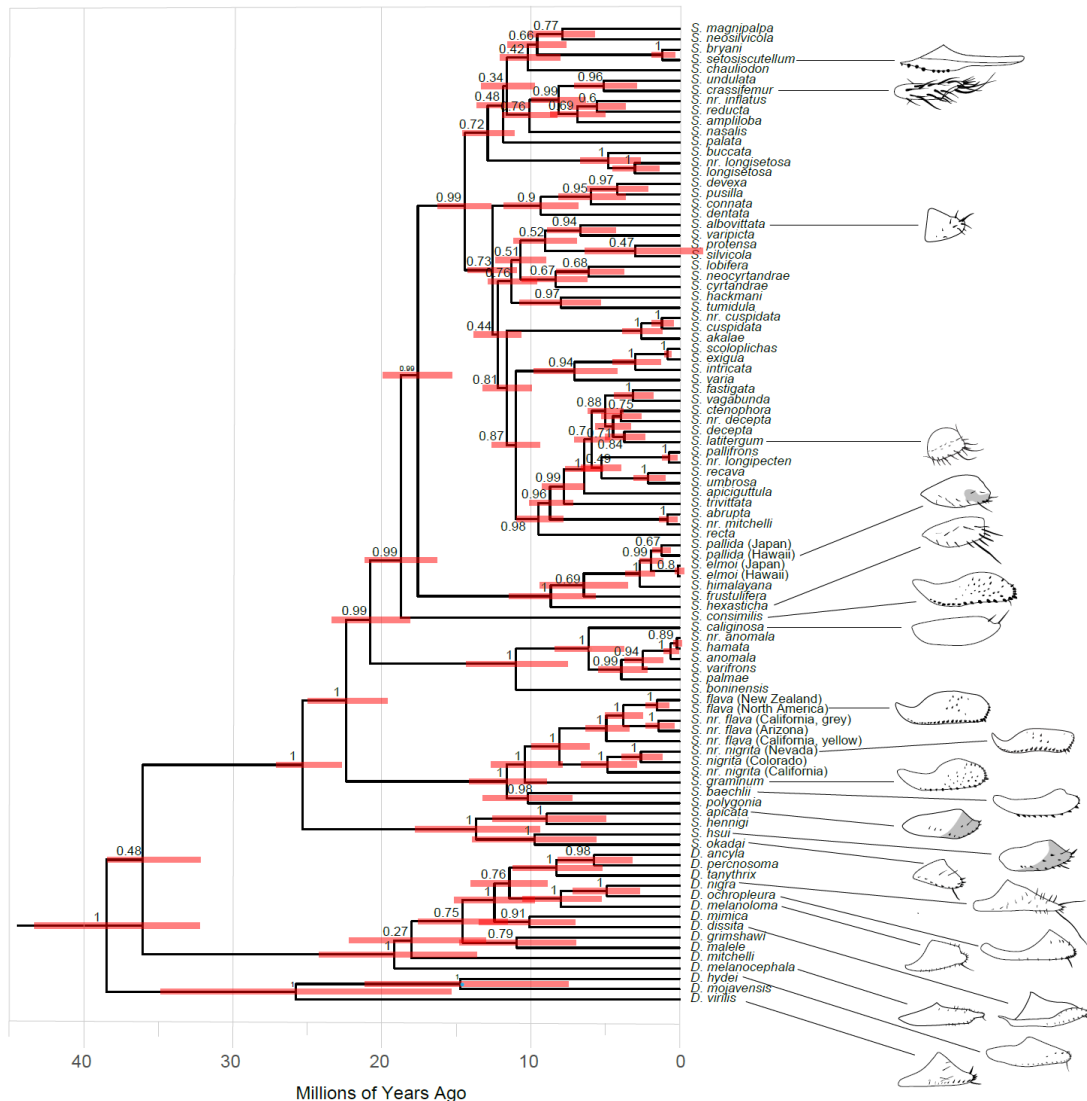

756  
 757 Figure S2 – ML tree.  
 758 **Phylogeny of subgenus *Drosophila* and *Scaptomyza* inferred from maximum likelihood (ML),**

759 using 11 genes (16S, 28S, *Adh*, *Cad-r* (rudimentary), *COI*, *COII*, *gstd1*, *gpdh*, *marf*, *ND2*, *n(l)tid*,  
 760 *Orco*) and fossil and biogeographic time calibrations. Nodes represent bootstrap value ( $\geq 50\%$ )  
 761 from ML analysis.

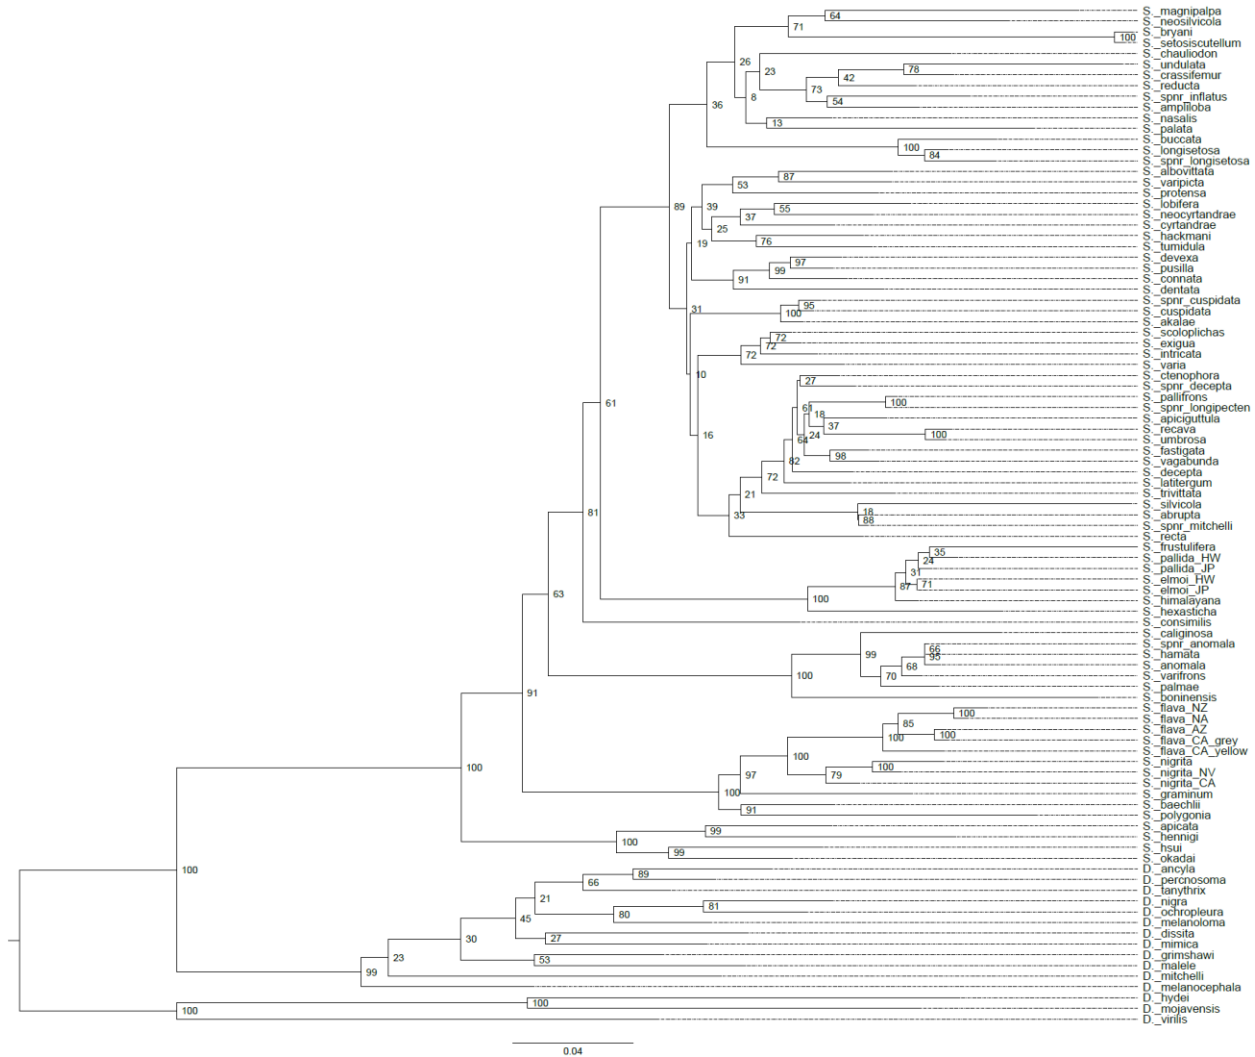

762

763

764 Figure S3 – CI for ASR on ovipositor bristle number.

765 **Confidence intervals for ancestral state estimations of ovipositor bristle number.** Values in

766 the table correspond to respective nodes given in the phylogeny.

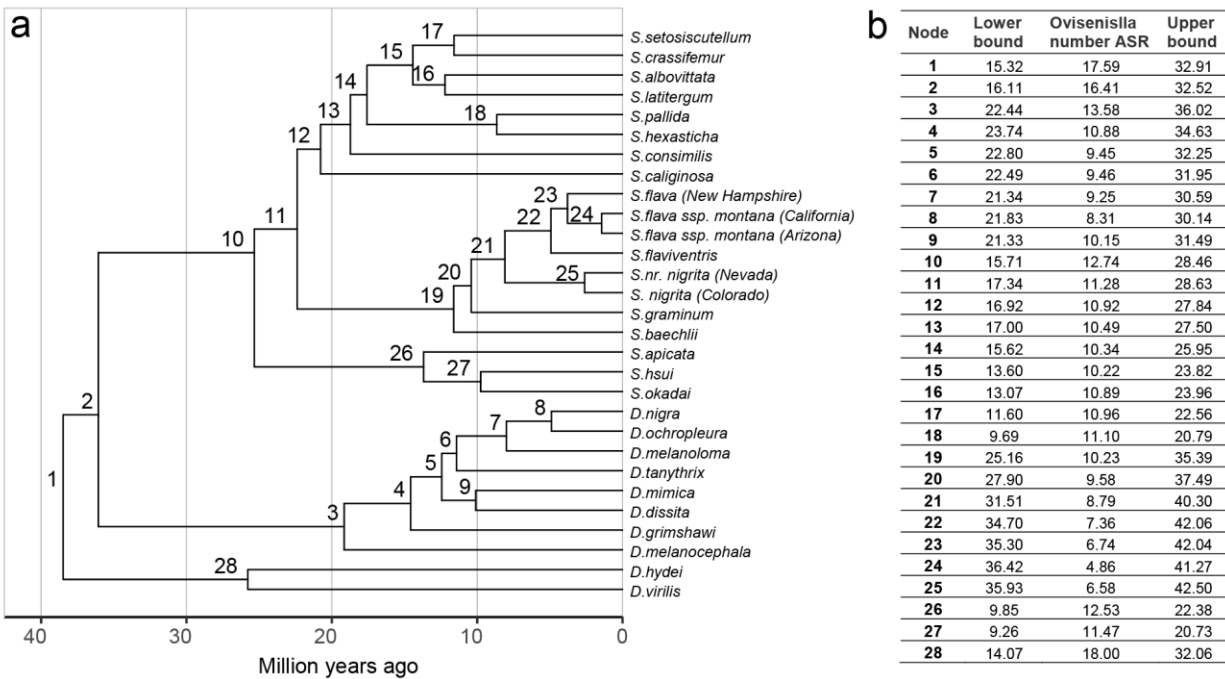

767

768

Figure S4 – Residual Analysis.

**Residual analysis on linear regression model on ovipositor bristle number.** Ovipositor bristle number, ovipositor length, and larval feeding ecology were obtained from Craddock et al. 2018, with additional data from this study (Suppl. Dataset S3). (a) Scatter plot of residuals on the y-axis and fitted values (estimated responses) on the x axis. (b) Histogram of residuals from (a).

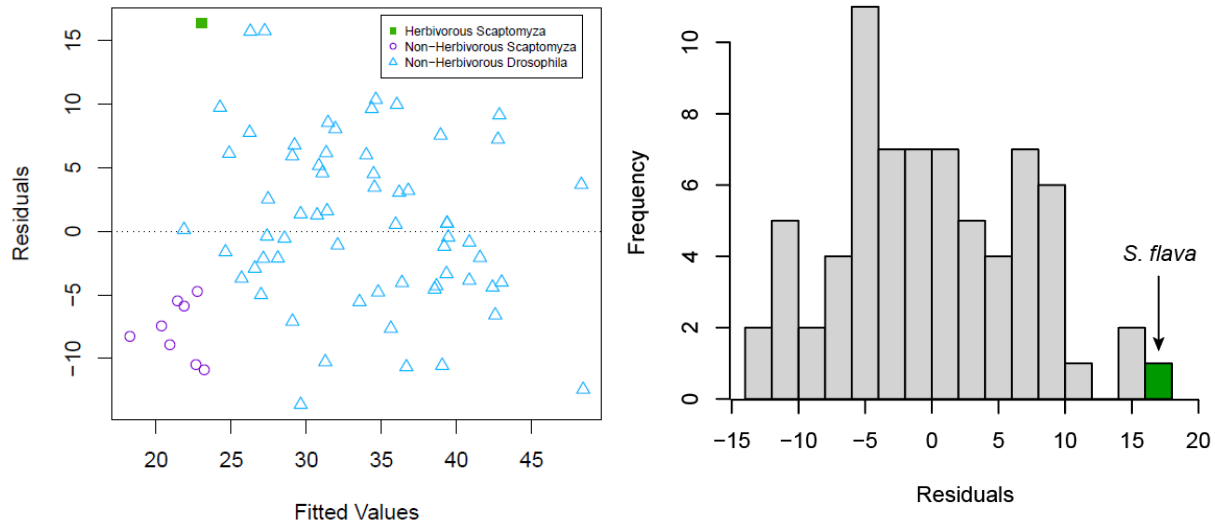

## Supplemental Tables (provided in a separate excel file.)

### References

1. Nylander JAA, Ronquist F, Huelsenbeck JP, Nieves-Aldrey JL. 2004 Bayesian phylogenetic analysis of combined data. *Syst. Biol.* **53**, 47–67.
2. Swofford DL, Sullivan J. 2003 Phylogeny inference based on parsimony and other methods using PAUP\*. *The phylogenetic handbook: a practical approach to DNA and protein phylogeny* **7**, 160–206.
3. Katoh T, Izumitani HF, Yamashita S, Watada M. 2017 Multiple origins of Hawaiian drosophilids: phylogeography of *Scaptomyza hardy* (Diptera: Drosophilidae). *Entomol. Sci.* **20**, 33–44.
4. Bouckaert R, Heled J, Kühnert D, Vaughan T, Wu C-H, Xie D, Suchard MA, Rambaut A, Drummond AJ. 2014 BEAST 2: a software platform for Bayesian evolutionary analysis.

- PLoS Comput. Biol.* **10**, e1003537.
5. Ayres DL *et al.* 2012 BEAGLE: an application programming interface and high-performance computing library for statistical phylogenetics. *Syst. Biol.* **61**, 170–173.
  6. Rambaut A, Suchard MA, Xie D, Drummond AJ. 2014 Tracer v1. 6. Computer program and documentation distributed by the author.
  7. Lynch M, Walsh B, Others. 1998 *Genetics and analysis of quantitative traits*. Sinauer Sunderland, MA.
  8. Bolger AM, Lohse M, Usadel B. 2014 Trimmomatic: a flexible trimmer for Illumina sequence data. *Bioinformatics* **30**, 2114–2120.
  9. Li H, Durbin R. 2009 Fast and accurate short read alignment with Burrows–Wheeler transform. *Bioinformatics* **25**, 1754–1760.
  10. Schlötterer C, Tobler R, Kofler R, Nolte V. 2014 Sequencing pools of individuals—mining genome-wide polymorphism data without big funding. *Nat. Rev. Genet.* **15**, 749–763.
  11. Li H *et al.* 2009 The Sequence Alignment/Map format and SAMtools. *Bioinformatics* **25**, 2078–2079.
  12. Kofler R, Pandey RV, Schlötterer C. 2011 PoPoolation2: identifying differentiation between populations using sequencing of pooled DNA samples (Pool-Seq). *Bioinformatics* **27**, 3435–3436.
  13. Yang J *et al.* 2011 Genomic inflation factors under polygenic inheritance. *Eur. J. Hum. Genet.* **19**, 807–812.
  14. Devlin B, Roeder K. 1999 Genomic control for association studies. *Biometrics* **55**, 997–1004.
  15. Thoen MPM *et al.* 2017 Genetic architecture of plant stress resistance: multi-trait genome-

- wide association mapping. *New Phytol.* **213**, 1346–1362.
16. Lunter G, Goodson M. 2011 Stampy: a statistical algorithm for sensitive and fast mapping of Illumina sequence reads. *Genome Res.* **21**, 936–939.
  17. McKenna A *et al.* 2010 The Genome Analysis Toolkit: a MapReduce framework for analyzing next-generation DNA sequencing data. *Genome Res.* **20**, 1297–1303.
  18. Quinlan AR, Hall IM. 2010 BEDTools: a flexible suite of utilities for comparing genomic features. *Bioinformatics* **26**, 841–842.
  19. Feder AF, Petrov DA, Bergland AO. 2012 LDx: estimation of linkage disequilibrium from high-throughput pooled resequencing data. *PLoS One* **7**, e48588.
  20. Li L, Stoeckert CJ Jr, Roos DS. 2003 OrthoMCL: identification of ortholog groups for eukaryotic genomes. *Genome Res.* **13**, 2178–2189.
  21. Drosophila 12 Genomes Consortium *et al.* 2007 Evolution of genes and genomes on the Drosophila phylogeny. *Nature* **450**, 203–218.
  22. Carlson M, Falcon S, Pages H, Li N. 2017 GO. db: A set of annotation maps describing the entire Gene Ontology. *R package version 3*, 10–18129.
  23. Gentleman RC *et al.* 2004 Bioconductor: open software development for computational biology and bioinformatics. *Genome Biol.* **5**, R80.
  24. Kofler R, Schlötterer C. 2012 Gowinda: unbiased analysis of gene set enrichment for genome-wide association studies. *Bioinformatics* **28**, 2084–2085.
  25. Kvon EZ, Kazmar T, Stampfel G, Yáñez-Cuna JO, Pagani M, Schernhuber K, Dickson BJ, Stark A. 2014 Genome-scale functional characterization of Drosophila developmental enhancers in vivo. *Nature* **512**, 91–95.
  26. Dmitriev DA, Rakitov RA. 2008 Decoding of superimposed traces produced by direct

sequencing of heterozygous indels. *PLoS Comput. Biol.* **4**, e1000113.





Table S2. Ovipositor bristle number and larval feeding ecology data for 95 species included in phylogenetic analyses to estimate the ancestral character states and perform phylogenetic generalized least squares. \* Data from Lapoint et al. 2013.

| Species                 | Larval Diet*      | Source for Bristle Counts                                                                           | Ovipositor Bristles |
|-------------------------|-------------------|-----------------------------------------------------------------------------------------------------|---------------------|
| <i>D. ancyla</i>        | saprophagy        |                                                                                                     |                     |
| <i>D. dissita</i>       | saprophagy        | Throckmorton 1966                                                                                   | 18                  |
| <i>D. grimshawi</i>     | saprophagy        | Craddock et al. 2018                                                                                | 36,42, 43           |
| <i>D. hydei</i>         | saprophagy        | Baechli et al. 2004                                                                                 | 23                  |
| <i>D. malele</i>        | unknown           |                                                                                                     |                     |
| <i>D. melanocephala</i> | saprophagy        | Craddock et al. 2018                                                                                | 39                  |
|                         |                   | Hardy 1967                                                                                          | 31                  |
| <i>D. melanoloma</i>    | fungus feeding    | Throckmorton 1966                                                                                   | 23                  |
| <i>D. mimica</i>        | saprophagy        | Craddock et al. 2018                                                                                | 30, 30              |
| <i>D. mitchelli</i>     | unknown           |                                                                                                     |                     |
| <i>D. mojavenensis</i>  | saprophagy        |                                                                                                     |                     |
| <i>D. nigra</i>         | unknown           | Hardy et al. 2001                                                                                   | 28                  |
|                         |                   | Throckmorton 1966                                                                                   | 27                  |
|                         |                   | Craddock et al. 2018                                                                                | 33, 33              |
| <i>D. ochropleura</i>   | fungus feeding    | Hardy et al. 2001                                                                                   | 21                  |
|                         |                   | Craddock et al. 2018                                                                                | 19                  |
|                         |                   | Craddock et al. 2018                                                                                | 23                  |
|                         |                   | Craddock et al. 2018                                                                                | 24                  |
| <i>D. percnosoma</i>    | saprophagy        |                                                                                                     |                     |
| <i>D. tanythrix</i>     | saprophagy        | Craddock et al. 2018                                                                                | 28                  |
| <i>D. virilis</i>       | saprophagy        | Sturtevant 1921                                                                                     | 20                  |
| <i>S. abrupta</i>       | unknown           |                                                                                                     |                     |
| <i>S. akalae</i>        | unknown           |                                                                                                     |                     |
| <i>S. albovittata</i>   | unknown           | Craddock & Kambysellis 1997                                                                         | 12                  |
|                         |                   | Craddock et al. 2018                                                                                | 10                  |
| <i>S. ampliloba</i>     | unknown           |                                                                                                     |                     |
| <i>S. anomala</i>       | unknown           |                                                                                                     |                     |
| <i>S. nr. anomala</i>   | unknown           |                                                                                                     |                     |
| <i>S. apicata</i>       | saprophagy        | Mount Hood National Forest,<br>Camp Creek                                                           | 11                  |
|                         |                   | Mount Hood National Forest,<br>Trout Creek                                                          | 13, 13              |
|                         |                   | Lab colony reared from wild<br>caught individuals from<br>Strawberry Creek, Berkeley,<br>California | 12, 14, 15          |
| <i>S. apiciguttula</i>  | saprophagy        |                                                                                                     |                     |
| <i>S. baechlii</i>      | unknown           | Sidorenko 1993                                                                                      | 15                  |
| <i>S. boninensis</i>    | unknown           | Okada 1973                                                                                          |                     |
| <i>S. bryani</i>        | spider predation  |                                                                                                     |                     |
| <i>S. buccata</i>       | unknown           |                                                                                                     |                     |
| <i>S. caliginosa</i>    | flower specialist | Craddock et al. 2018                                                                                | 16                  |
| <i>S. chauliodon</i>    | spider predation  |                                                                                                     |                     |
| <i>S. connata</i>       | unknown           |                                                                                                     |                     |
| <i>S. consimilis</i>    | saprophagy        | Baechli et al. 2004                                                                                 | 45                  |

|                                           |                  |                                                                                     |                                                |
|-------------------------------------------|------------------|-------------------------------------------------------------------------------------|------------------------------------------------|
| <i>S. crassifemur</i>                     | unknown          | Throckmorton 1966                                                                   | 20                                             |
|                                           |                  | Craddock et al. 2018                                                                | 18                                             |
|                                           |                  | Grimaldi                                                                            | 20                                             |
|                                           |                  | Hardy 1965                                                                          | 20                                             |
| <i>S. ctenophora</i>                      | unknown          |                                                                                     |                                                |
| <i>S. cuspidata</i>                       | saprophagy       |                                                                                     |                                                |
| <i>S. nr. cuspidata</i>                   | saprophagy       |                                                                                     |                                                |
| <i>S. cyrtandrae</i>                      | saprophagy       |                                                                                     |                                                |
| <i>S. decepta</i>                         | unknown          |                                                                                     |                                                |
| <i>S. nr. decepta</i>                     | unknown          |                                                                                     |                                                |
| <i>S. dentata</i>                         | unknown          |                                                                                     |                                                |
| <i>S. devexa</i>                          | unknown          |                                                                                     |                                                |
| <i>S. elmoi (Hawaii)</i>                  | saprophagy       |                                                                                     |                                                |
| <i>S. elmoi (Japan)</i>                   | saprophagy       |                                                                                     |                                                |
| <i>S. exigua</i>                          | saprophagy       |                                                                                     |                                                |
| <i>S. fastigata</i>                       | unknown          |                                                                                     |                                                |
| <i>S. flava (North America)</i>           | leaf-mining      | Lab colony, reared from wild caught individuals from New Hampshire                  | 34, 35, 38, 38, 40, 40, 40, 40, 41, 41, 41, 44 |
| <i>S. flava (New Zealand)</i>             | leaf-mining      |                                                                                     |                                                |
| <i>S. flava ssp. montana (California)</i> | leaf-mining      | Strawberry Creek, Berkeley, California                                              | 37, 39                                         |
|                                           |                  | Lab colony, reared from wild caught individuals from Strawberry Creek, Berkeley, CA | 27, 36, 37, 37, 38, 40, 40, 42                 |
| <i>S. flava ssp. montana (Arizona)</i>    | leaf-mining      | Lab colony, reared from wild caught individuals from Arizona                        | 37, 37, 37, 39, 40, 41, 42, 42, 44, 46         |
| <i>S. flaviventris</i>                    | leaf-mining      | Santa Cruz, California                                                              | 39, 43                                         |
| <i>S. frustulifera</i>                    | unknown          |                                                                                     |                                                |
| <i>S. graminum</i>                        | leaf-mining      | Baechli et al. 2004                                                                 | 39                                             |
| <i>S. hackmani</i>                        | saprophagy       |                                                                                     |                                                |
| <i>S. hamata</i>                          | unknown          |                                                                                     |                                                |
| <i>S. hennigi</i>                         | unknown          |                                                                                     |                                                |
| <i>S. hexasticha</i>                      | unknown          | Okada 1973                                                                          | 14                                             |
| <i>S. himalayana</i>                      | unknown          |                                                                                     |                                                |
| <i>S. hsui</i>                            | saprophagy       | Thomas Creek, Nevada                                                                | 11, 11, 12, 12, 12, 12, 13                     |
|                                           |                  | Mount Hood National Forest, Still Creek, Oregon                                     | 12                                             |
|                                           |                  | Rocky Mountain Biological Lab, near Gothic, Colorado                                | 12, 15                                         |
| <i>S. nr. inflatus</i>                    | unknown          |                                                                                     |                                                |
| <i>S. intricata</i>                       | saprophagy       |                                                                                     |                                                |
| <i>S. latitergum</i>                      | saprophagy       | Throckmorton 1966                                                                   | 25                                             |
| <i>S. lobifera</i>                        | unknown          |                                                                                     |                                                |
| <i>S. nr. longipecten</i>                 | saprophagy       |                                                                                     |                                                |
| <i>S. longisetosa</i>                     | unknown          |                                                                                     |                                                |
| <i>S. nr. longisetosa</i>                 | unknown          |                                                                                     |                                                |
| <i>S. magnipalpa</i>                      | spider predation |                                                                                     |                                                |
| <i>S. nr. mitchelli</i>                   | unknown          |                                                                                     |                                                |

|                                    |                   |                                                                         |                            |
|------------------------------------|-------------------|-------------------------------------------------------------------------|----------------------------|
| <i>S. nasalis</i>                  | unknown           |                                                                         |                            |
| <i>S. neocyrtandrae</i>            | saprophagy        |                                                                         |                            |
| <i>S. neosilvicola</i>             | spider predation  |                                                                         |                            |
| <i>S. nigrita</i> (Colorado)       | leaf-mining       | Rocky Mountain Biological Lab, near Gothic, Colorado                    | 37, 38, 39, 41, 41, 42, 42 |
| <i>S. nr. nigrita</i> (California) | leaf-mining       |                                                                         |                            |
| <i>S. nr. nigrita</i> (Nevada)     | leaf-mining       | Lab colony, reared from wild caught individuals from Lake Tahoe, Nevada | 38, 38, 44                 |
| <i>S. okadae</i>                   | unknown           | Hackman 1959                                                            | 15                         |
| <i>S. palata</i>                   | unknown           |                                                                         |                            |
| <i>S. pallida</i> (Japan)          | saprophagy        |                                                                         |                            |
| <i>S. pallida</i> (North American) | saprophagy        | Mount Hood National Forest, Still Creek, Oregon                         | 8, 8, 9, 10, 11, 12, 12    |
|                                    |                   | Mount Hood National Forest, Camp Creek, Oregon                          | 13                         |
|                                    |                   | Baechli et al. 2004                                                     | 17                         |
| <i>S. pallifrons</i>               | unknown           |                                                                         |                            |
| <i>S. palmae</i>                   | flower specialist |                                                                         |                            |
| <i>S. polygonia</i>                | saprophagy        |                                                                         |                            |
| <i>S. protensa</i>                 | unknown           |                                                                         |                            |
| <i>S. pusilla</i>                  | unknown           |                                                                         |                            |
| <i>S. recava</i>                   | unknown           |                                                                         |                            |
| <i>S. recta</i>                    | unknown           |                                                                         |                            |
| <i>S. reducta</i>                  | unknown           |                                                                         |                            |
| <i>S. scoloplichas</i>             | saprophagy        |                                                                         |                            |
| <i>S. setosiscutellum</i>          | spider predation  | Hardy 1965                                                              | 8                          |
| <i>S. silvicola</i>                | unknown           |                                                                         |                            |
| <i>S. trivittata</i>               | unknown           |                                                                         |                            |
| <i>S. tumidula</i>                 | saprophagy        |                                                                         |                            |
| <i>S. umbrosa</i>                  | unknown           |                                                                         |                            |
| <i>S. undulata</i>                 | unknown           |                                                                         |                            |
| <i>S. vagabunda</i>                | unknown           |                                                                         |                            |
| <i>S. varia</i>                    | saprophagy        |                                                                         |                            |
| <i>S. varipicta</i>                | saprophagy        |                                                                         |                            |
| <i>S. varifrons</i>                | unknown           |                                                                         |                            |

Table S3. Comparison of models of evolution for ovipositor bristle number.

| <b>Model</b>       | <b>log likelihood</b> | <b>AIC</b> | <b>AICc</b> | <b>dAICc</b> | <b>AICc Weights</b> | <b>Parameter Estimates</b>            |
|--------------------|-----------------------|------------|-------------|--------------|---------------------|---------------------------------------|
| Brownian Motion    | -104.694              | 213.388    | 213.849     | 0            | 0.622               | $\sigma^2 = 4.82$                     |
| Ornstein-Uhlenbeck | -104.586              | 215.172    | 216.131     | 2.282        | 0.199               | $\alpha = 0.014, \sigma^2 = 6.066$    |
| Early Burst        | -104.694              | 215.388    | 216.348     | 2.499        | 0.178               | $\alpha = -0.000001, \sigma^2 = 4.82$ |
| White Noise        | -111.734              | 227.468    | 227.93      | 14.081       | 0.001               | $\sigma^2 = 130.051$                  |

Table S4. Comparison of models of evolution for larval diet.

| <b>Model</b>            | <b>log likelihood</b> | <b>AIC</b> | <b>AICc</b> | <b>dAICc</b> | <b>AICc Weights</b> |
|-------------------------|-----------------------|------------|-------------|--------------|---------------------|
| <b>Equal rates</b>      | -23.390472            | 48.780944  | 48.86428    | 0            | 0.999983843         |
| <b>Symmetric</b>        | -22.644779            | 65.289559  | 70.93059    | 22.06631     | 1.62E-05            |
| <b>All rates differ</b> | -22.389445            | 84.77889   | 113.7444    | 64.88013     | 8.16E-15            |

Table S5. Ovipositor length, ovipositor bristle number, and larval feeding ecology data for 67 species from Craddock et al. 2018 and 4 species from this study (denoted with \*), used to evaluate the relationship between ovipositor length and bristle number. Ovipositor bristle counts were averaged across individuals and ovipositor valves when measures for both were present.

| Species                  | Larval Diet       | Thorax length | Ovipositor  | Ovipositor |
|--------------------------|-------------------|---------------|-------------|------------|
| <i>D. ambochila</i>      | decaying bark     | 1.57          | 858.5       | 39.5       |
| <i>D. bostrycha</i>      | decaying bark     | NA            | 630         | 45         |
| <i>D. craddockae</i>     | decaying bark     | 1.92          | 763         | 34.375     |
| <i>D. cyrtoloma</i>      | decaying bark     | 3.37          | 906         | 39         |
| <i>D. engyochracea</i>   | decaying bark     | 2.47          | 901         | 52         |
| <i>D. hemipeza</i>       | decaying bark     | 2.46          | 701         | 40         |
| <i>D. melanocephala</i>  | decaying bark     | 3.07          | 789         | 39         |
| <i>D. nigribasis</i>     | decaying bark     | 2.84          | 898         | 50         |
| <i>D. oahuensis</i>      | decaying bark     | 2.95          | 835         | 40         |
| <i>D. orphnopeza</i>     | decaying bark     | 2.11          | 1085        | 36         |
| <i>D. peniculipedis</i>  | decaying bark     | NA            | 465         | 31         |
| <i>D. primaeva</i>       | decaying bark     | 3             | 446.5       | 35         |
| <i>D. pullipes</i>       | decaying bark     | 2.42          | 835         | 37         |
| <i>D. silvestris</i>     | decaying bark     | 2.59          | 772         | 46.5       |
| <i>D. sproati</i>        | decaying bark     | NA            | 892         | 36         |
| <i>D. mimica</i>         | decaying fruit    | 1.77          | 393.5       | 30         |
| <i>D. adunca</i>         | decaying leaves   | 2.66          | 775.5       | 28.5       |
| <i>D. antecedans</i>     | decaying leaves   | 1.73          | 300         | 23         |
| <i>D. conjectura</i>     | decaying leaves   | NA            | 209         | 22         |
| <i>D. diamphidiopoda</i> | decaying leaves   | 2.17          | 519         | 21         |
| <i>D. kambysellisi</i>   | decaying leaves   | 1.42          | 383         | 25         |
| <i>D. tanythrix</i>      | decaying leaves   | 2.39          | 663         | 28         |
| <i>D. waddingtoni</i>    | decaying leaves   | 1.31          | 465         | 16         |
| <i>S. apicata*</i>       | decaying leaves   | NA            | 253.32      | 12.33      |
| <i>S. hsui*</i>          | decaying leaves   | NA            | 235.35      | 12.2       |
| <i>S. pallida*</i>       | decaying leaves   | NA            | 177.75      | 12         |
| <i>S. caliginosa</i>     | flower specialist | 0.9           | 209         | 16         |
| <i>S. sp. 2</i>          | flower specialist | NA            | 160         | 13         |
| <i>D. fungiperda</i>     | fungus            | 1.6           | 308         | 31         |
| <i>D. iki</i>            | fungus            | 1.74          | 429.5       | 28         |
| <i>D. nigella</i>        | fungus            | 1.77          | 353         | 34         |
| <i>D. ochropleura</i>    | fungus            | 1.52          | 335.3333333 | 22         |
| <i>S. flava*</i>         | leaf-mining       | NA            | 247.52      | 39.42      |
| <i>D. longiseta</i>      | decaying leaves   | 2.92          | 697         | 26         |
| <i>D. plantibia</i>      | multiple          | 2.71          | 786.5       | 40         |
| <i>D. imparisetae</i>    | multiple          | 1.19          | 391         | 27         |
| <i>D. disjuncta</i>      | multiple          | 2.2           | 521         | 37.5       |
| <i>D. grimshawi</i>      | multiple          | 2.13          | 681.25      | 39.25      |
| <i>D. eximia</i>         | multiple          | 1.27          | 525         | 40         |
| <i>D. hirititibia</i>    | multiple          | 1.06          | 785         | 36         |
| <i>D. hawaiiensis</i>    | sap flux          | 2             | 546         | 31         |
| <i>D. musaphilia</i>     | sap flux          | NA            | 1081        | 52         |
| <i>D. picticornis</i>    | sap flux          | 1.77          | 512.66      | 35.66      |

|                          |               |       |        |       |
|--------------------------|---------------|-------|--------|-------|
| <i>D. recticilia</i>     | sap flux      | NA    | 687.33 | 32.33 |
| <i>D. silvarentis</i>    | sap flux      | NA    | 594    | 28    |
| <i>D. heedi</i>          | sap flux      | 1.53  | 447    | 22    |
| <i>D. cilifera</i>       | decaying stem | 2.17  | 501    | 32    |
| <i>D. adiaistola</i>     | decaying stem | 2.14  | 451.5  | 36    |
| <i>D. assita</i>         | decaying stem | 1.48  | 780    | 38    |
| <i>D. clavisetae</i>     | decaying stem | 2.71  | 625    | 39    |
| <i>D. differens</i>      | decaying stem | 3.09  | 886    | 38    |
| <i>D. limitata</i>       | decaying stem | NA    | 759    | 34    |
| <i>D. ornata</i>         | decaying stem | 2.48  | 676    | 46    |
| <i>D. setosimentum</i>   | decaying stem | 2.13  | 505    | 36    |
| <i>D. cilifemorata</i>   | unknown       | 1.71  | 378    | 22    |
| <i>D. comatifemora</i>   | unknown       | 1.96  | 415    | 26    |
| <i>D. eurypeza</i>       | unknown       | 1.48  | 354.5  | 42    |
| <i>D. fasciculisetae</i> | unknown       | 2.49  | 673.5  | 36.5  |
| <i>D. formella</i>       | unknown       | NA    | 621    | 44    |
| <i>D. haleakalae</i>     | unknown       | 1.9   | 288    | 34    |
| <i>D. hamifera</i>       | unknown       | 2.71  | 541    | 40    |
| <i>D. hirtipalpus</i>    | unknown       | NA    | 627    | 38    |
| <i>D. longiperda</i>     | unknown       | 2     | 386    | 43    |
| <i>D. mulli</i>          | unknown       | 1.77  | 786    | 40    |
| <i>D. nigra</i>          | unknown       | 2.18  | 523    | 33    |
| <i>D. sooneae</i>        | unknown       | 1.645 | 364.33 | 23.66 |
| <i>D. stigma</i>         | unknown       | 2.32  | 635    | 30    |
| <i>D. truncipenna</i>    | unknown       | 3.22  | 609    | 40    |
| <i>S. albovittata</i>    | unknown       | 0.79  | 90     | 10    |
| <i>S. crassifemur</i>    | unknown       | 1.98  | 238    | 18    |
| <i>S. sp. 1</i>          | unknown       | 1     | 195    | 16    |



Table S6. Full dataset used to evaluate whether SNP effect sizes identified from the pool-GWAS on ovipositor bristle number in *S. flava* could be replicated through individual sequencing. SNP214 represents the candidate SNP identified from the pool-GWAS. Other SNPs and indels that were present at a minimum variant frequency of 0.05 within the sequenced region are also presented. Ovipositor length is given in um. Raw sequence data is available on Genbank (accession no. MH884655-MH884734).

| ID      | Population_HostPlant | Population | PegPool | PegNumConsensus | OviLengthConsensus | SNP214 | SNP214. | SNP49 | Indel213 | SNP215 | SNP235 | SNP236 |
|---------|----------------------|------------|---------|-----------------|--------------------|--------|---------|-------|----------|--------|--------|--------|
| P4RAC11 | NH1_TurrBarb         | NH1        | low     | 35              | 0.2517             | AA     | 0       | AA    | TT       | TT     | TT     | CC     |
| P4RAC8  | NH1_TurrBarb         | NH1        | high    | 42              | 0.25407            | CA     | 1       | AA    | T-       | GG     | NA     | NA     |
| P4RBC1  | NH1_TurrBarb         | NH1        | high    | 44              | 0.24112            | CC     | 2       | TT    | --       | GG     | CC     | TT     |
| P4RBC2  | NH1_TurrBarb         | NH1        | low     | 34              | 0.259545           | AA     | 0       | AA    | TT       | TT     | TT     | CC     |
| P4RBC4  | NH1_TurrBarb         | NH1        | high    | 45              | 0.2343275          | CC     | 2       | TT    | --       | GG     | CC     | TT     |
| P4RBC5  | NH1_TurrBarb         | NH1        | low     | 35              | 0.23715            | AA     | 0       | AA    | TT       | TT     | TT     | CC     |
| P4RBC6  | NH1_TurrBarb         | NH1        | high    | 46              | 0.2461875          | CA     | 1       | AA    | T-       | GG     | NA     | NA     |
| P4RBC7  | NH1_TurrBarb         | NH1        | high    | 41              | 0.23348            | CC     | 2       | AA    | --       | TT     | CC     | TT     |
| P4RCC10 | NH1_TurrBarb         | NH1        | high    | 44              | 0.2679325          | CC     | 2       | TT    | --       | GG     | CC     | TT     |
| P4RCC11 | NH1_TurrBarb         | NH1        | high    | 42              | 0.2499625          | CA     | 1       | AA    | T-       | TT     | TT     | CC     |
| P4RCC12 | NH1_TurrBarb         | NH1        | high    | 44              | 0.2506275          | CC     | 2       | TT    | --       | GG     | CC     | TT     |
| P4RCC3  | NH1_TurrBarb         | NH1        | high    | 44              | 0.26938            | AA     | 0       | AA    | TT       | TT     | TT     | CC     |
| P4RCC9  | NH1_TurrBarb         | NH1        | high    | 42              | 0.23166            | CA     | 1       | AA    | TT       | GT     | CT     | CT     |
| P4RDC1  | NH1_TurrBarb         | NH1        | low     | 36              | 0.249805           | CC     | 2       | AA    | TT       | GG     | CC     | TT     |
| P4REC3  | NH1_TurrBarb         | NH1        | low     | 34              | 0.2359825          | AA     | 0       | AA    | TT       | TT     | TT     | CC     |
| P4REC6  | NH1_TurrBarb         | NH1        | high    | 43              | 0.26402            | CC     | 2       | TT    | --       | GG     | CC     | TT     |
| P4REC7  | NH1_TurrBarb         | NH1        | low     | 34              | 0.2461375          | AA     | 0       | AA    | TT       | TT     | TT     | CC     |
| P4REC8  | NH1_TurrBarb         | NH1        | low     | 34              | 0.2495625          | CC     | 2       | AA    | --       | GG     | CC     | TT     |
| P4RFC1  | NH1_TurrBarb         | NH1        | low     | 34              | 0.228205           | CA     | 1       | AA    | T-       | TT     | TT     | CC     |
| P4RFC11 | NH1_TurrBarb         | NH1        | low     | 37              | 0.26311            | CC     | 2       | TT    | --       | GG     | CC     | TT     |
| P4RFC3  | NH1_TurrBarb         | NH1        | low     | 37              | 0.2603725          | CA     | 1       | AA    | T-       | TT     | TT     | CC     |
| P4RGC2  | NH1_TurrBarb         | NH1        | high    | 44              | 0.2702375          | CC     | 2       | TT    | --       | GG     | CC     | TT     |
| P4RGC4  | NH1_TurrBarb         | NH1        | high    | 42              | 0.2425425          | AA     | 0       | AA    | TT       | TT     | TT     | CC     |
| P4RGC5  | NH1_TurrBarb         | NH1        | high    | 43              | 0.236325           | CC     | 2       | TT    | --       | GG     | CC     | TT     |
| P4RGC8  | NH1_TurrBarb         | NH1        | low     | 34              | 0.24738            | AA     | 0       | AA    | TT       | TT     | TT     | CC     |
| P4RGC9  | NH1_TurrBarb         | NH1        | low     | 34              | 0.245095           | CA     | 1       | AA    | T-       | TT     | TT     | CC     |
| P4RHC1  | NH1_TurrBarb         | NH1        | low     | 36              | 0.267935           | CA     | 1       | AA    | T-       | GG     | NA     | NA     |
| P4RHC11 | NH1_TurrBarb         | NH1        | high    | 46              | 0.25933            | CC     | 2       | TT    | --       | GG     | CC     | TT     |
| P4RHC3  | NH1_TurrBarb         | NH1        | high    | 44              | 0.2554425          | CA     | 1       | AA    | T-       | TT     | TT     | CC     |
| P4RHC4  | NH1_TurrBarb         | NH1        | low     | 33              | 0.25277            | AA     | 0       | AA    | TT       | TT     | TT     | CC     |
| P4RHC6  | NH1_TurrBarb         | NH1        | low     | 45              | 0.25376            | AA     | 0       | AA    | TT       | TT     | TT     | CC     |
| P5RAC4  | NH1_TurrBarb         | NH1        | low     | 37              | 0.2677875          | CC     | 2       | TT    | --       | GG     | CC     | TT     |
| P5RAC6  | NH1_TurrBarb         | NH1        | low     | 35              | 0.243765           | AA     | 0       | AA    | TT       | TT     | TT     | CC     |
| P5RBC1  | NH1_TurrBarb         | NH1        | low     | 33              | 0.243675           | AA     | 0       | AA    | TT       | TT     | TT     | CC     |
| P5RBC10 | NH1_TurrBarb         | NH1        | low     | 37              | 0.2280675          | CC     | 2       | AA    | --       | GG     | CC     | TT     |
| P5RBC2  | NH1_TurrBarb         | NH1        | high    | 46              | 0.2396925          | CC     | 2       | TT    | --       | GG     | CC     | TT     |
| P5RBC3  | NH1_TurrBarb         | NH1        | low     | 33              | 0.250805           | CA     | 1       | AA    | T-       | GG     | NA     | NA     |
| P6RAC10 | NH2_Turr             | NH2        | high    | 45              | 0.2258725          | CA     | 1       | AA    | T-       | TT     | NA     | NA     |
| P6RAC11 | NH2_Turr             | NH2        | low     | 35              | 0.2362175          | CA     | 1       | AA    | T-       | TT     | NA     | NA     |
| P6RAC4  | NH2_Turr             | NH2        | low     | 38              | 0.259065           | CC     | 2       | AA    | TT       | GG     | CC     | TT     |
| P6RAC5  | NH2_Turr             | NH2        | low     | 39              | 0.2686325          | CA     | 1       | AA    | T-       | GG     | NA     | NA     |
| P6RBC11 | NH2_Turr             | NH2        | low     | 37              | 0.254155           | CC     | 2       | TT    | --       | GG     | CC     | TT     |
| P6RBC2  | NH2_Turr             | NH2        | high    | 46              | 0.2667175          | CC     | 2       | AA    | --       | GG     | CC     | TT     |
| P6RBC3  | NH2_Turr             | NH2        | high    | 43              | 0.2447975          | CC     | 2       | AA    | TT       | GG     | CC     | TT     |
| P6RBC4  | NH2_Turr             | NH2        | high    | 45              | 0.2592575          | CC     | 2       | TT    | --       | GG     | CC     | TT     |
| P6RBC7  | NH2_Turr             | NH2        | low     | 33              | 0.2423825          | CA     | 1       | AA    | TT       | GT     | CT     | CC     |
| P6RCC1  | NH2_Turr             | NH2        | low     | 37              | 0.2520475          | CC     | 2       | AA    | --       | GG     | CC     | TT     |
| P6RDC1  | NH2_Turr             | NH2        | low     | 37              | 0.2641875          | CA     | 1       | AA    | T-       | TT     | NA     | NA     |
| P6RDC11 | NH2_Turr             | NH2        | high    | 41              | 0.24728            | AA     | 0       | AA    | TT       | TT     | TT     | CC     |
| P6RDC4  | NH2_Turr             | NH2        | high    | 43              | 0.2496975          | CC     | 2       | TT    | --       | GG     | CC     | TT     |
| P6RDC5  | NH2_Turr             | NH2        | low     | 36              | 0.2554225          | CA     | 1       | AA    | T-       | TT     | NA     | NA     |
| P6REC4  | NH2_Turr             | NH2        | high    | 44              | 0.254275           | CC     | 2       | AA    | --       | GG     | CC     | TT     |
| P6REC5  | NH2_Turr             | NH2        | high    | 42              | 0.25232            | AA     | 0       | AA    | TT       | TT     | TT     | CC     |
| P6REC8  | NH2_Turr             | NH2        | low     | 37              | 0.264415           | AA     | 0       | AA    | TT       | TT     | TT     | CC     |
| P7RAC1  | NH2_Barb             | NH2        | high    | 43              | 0.26528            | CC     | 2       | TT    | --       | GG     | CC     | TT     |
| P7RAC11 | NH2_Barb             | NH2        | high    | 45              | 0.2556975          | CA     | 1       | AA    | T-       | GG     | NA     | NA     |
| P7RAC5  | NH2_Barb             | NH2        | high    | 43              | 0.26603            | CC     | 2       | AA    | --       | GG     | CC     | TT     |
| P7RAC6  | NH2_Barb             | NH2        | low     | 35              | 0.2552775          | AA     | 0       | AA    | TT       | TT     | TT     | CC     |
| P7RAC8  | NH2_Barb             | NH2        | high    | 43              | 0.2599025          | CC     | 2       | AA    | --       | GT     | CC     | TT     |
| P7RBC1  | NH2_Barb             | NH2        | low     | 34              | 0.23766            | CA     | 1       | AA    | T-       | TT     | TT     | CC     |
| P7RBC10 | NH2_Barb             | NH2        | high    | 41              | 0.2358675          | CC     | 2       | AA    | --       | TT     | CC     | TT     |
| P7RBC2  | NH2_Barb             | NH2        | low     | 36              | 0.259495           | CA     | 1       | AA    | T-       | GG     | NA     | NA     |
| P7RBC3  | NH2_Barb             | NH2        | high    | 41              | 0.24551            | CC     | 2       | TT    | --       | GG     | CC     | TT     |
| P7RBC6  | NH2_Barb             | NH2        | high    | 44              | 0.264935           | CA     | 1       | AA    | TT       | GT     | TT     | CC     |
| P7RCC6  | NH2_Barb             | NH2        | low     | 35              | 0.264415           | CC     | 2       | AA    | --       | TT     | CC     | TT     |
| P7RCC8  | NH2_Barb             | NH2        | low     | 33              | 0.2554             | CC     | 2       | TT    | --       | GG     | CC     | TT     |
| P7RDC3  | NH2_Barb             | NH2        | high    | 45              | 0.26756            | CC     | 2       | AA    | T-       | GG     | NA     | NA     |
| P7RDC5  | NH2_Barb             | NH2        | low     | 36              | 0.2540675          | CC     | 2       | AA    | T-       | GG     | NA     | NA     |
| P7REC1  | NH2_Barb             | NH2        | high    | 43              | 0.2509475          | CC     | 2       | AA    | TT       | GG     | CC     | TT     |
| P7REC10 | NH2_Barb             | NH2        | low     | 34              | 0.266085           | AA     | 0       | AA    | TT       | TT     | TT     | CC     |
| P7REC5  | NH2_Barb             | NH2        | high    | 44              | 0.2623275          | CA     | 1       | AA    | T-       | TT     | TT     | CC     |
| P7REC6  | NH2_Barb             | NH2        | high    | 44              | 0.2675825          | CC     | 2       | AA    | TT       | GG     | CC     | TT     |
| P7REC7  | NH2_Barb             | NH2        | low     | 34              | 0.2631             | AA     | 0       | AA    | TT       | TT     | TT     | CC     |
| P7RGC3  | NH2_Barb             | NH2        | high    | 44              | 0.2759375          | CA     | 1       | AA    | TT       | GT     | TT     | CC     |

bioRxiv preprint doi: <https://doi.org/10.1101/2020.05.07.083253>; this version posted September 23, 2021. The copyright holder for this preprint (which was not certified by peer review) is the author/funder, who has granted bioRxiv a license to display the preprint in perpetuity. It is made available under aCC-BY-NC 4.0 International license.

Table S7. Summary of the phylogenetic least squares regression model testing for the effects of larval diet (herbivorous and non-herbivorous) on ovipositor bristle number per valve. For larval diet categorization, the reference category is 'herbivorous.' This analysis only includes the species reported in Table S2 that have both larval diet and ovipositor bristle counts available.  $F_{1, 21} = 4.328$ ,  $p = 0.049$ ,  $n = 23$  species,  $\lambda = 1.018$ .

| <b>term</b> | <b>estimate</b> | <b>s.e.m</b> | <b><i>t</i></b> | <b><i>p</i></b> |
|-------------|-----------------|--------------|-----------------|-----------------|
| intercept   | 42.166          | 10.207       | 4.131           | 0.001           |
| Diet (non-  | -19.073         | 9.168        | -2.08           | 0.05            |

Table S8. Summary of the regression model testing for the effects of ovipositor length and female thorax length on ovipositor bristle number. Data for 67 species were taken from Craddock et al. 2018, with additional data obtained for 4 species in this study. All species and measurements are listed in Table S3. Bristle counts were averaged across individuals within a species and across both ovipositor valves, when present.  $R^2 = 0.488$ ,  $F_{2, 53} = 25.24$ ,  $p < 0.001$ .

| <b>term</b>   | <b>estimate</b> | <b>s.e.m</b> | <b><i>t</i></b> | <b><i>p</i></b> |
|---------------|-----------------|--------------|-----------------|-----------------|
| intercept     | 13.517          | 3.147        | 4.295           | <0.001          |
| Ovipositor    | 0.022           | 0.005        | 4.299           | <0.001          |
| Female thorax | 3.458           | 1.788        | 1.934           | 0.059           |

Table S9. Top SNPs associated with variation in ovipositor bristle number from the pool genome-wide association study are shown in descending P-value ranking.

| P-value   | Scaffold                     | Position | P-value  | FDR q | Nearby gene(s)                         | SNP location relative | Gene function <sup>a</sup>                                                                                                                                                       |                                                                                                                                               |
|-----------|------------------------------|----------|----------|-------|----------------------------------------|-----------------------|----------------------------------------------------------------------------------------------------------------------------------------------------------------------------------|-----------------------------------------------------------------------------------------------------------------------------------------------|
| <b>1</b>  | scaffold00465<br>[104,011]   | 184      | 4.66E-09 | 0.008 | <b>Muscle-specific protein</b>         | 453 bp downstream     | Actin binding; cytoskeleton organization; required for proper positioning of muscle nuclei, mitochondria, and neuromuscular junction                                             |                                                                                                                                               |
| <b>6</b>  |                              | 188      | 2.94E-07 | 0.069 |                                        | 449 bp downstream     |                                                                                                                                                                                  |                                                                                                                                               |
| <b>16</b> |                              | 187      | 7.56E-07 | 0.076 |                                        | 450 bp downstream     |                                                                                                                                                                                  |                                                                                                                                               |
| <b>2</b>  | scaffold00015<br>[769,991]   | 186,025  | 4.26E-08 | 0.036 | <b>heavyweight</b>                     | 8,623 bp downstream   | Predicted to have phosphotyrosine residue binding activity; polymorphisms associated with body mass and starvation resistance                                                    |                                                                                                                                               |
|           |                              |          |          |       | <b>cuticular protein 11B</b>           | 1,625 bp downstream   |                                                                                                                                                                                  | Chitin-based cuticle development                                                                                                              |
| <b>3</b>  | scaffold00063<br>[441,164]   | 140,206  | 6.69E-08 | 0.037 | <b>G protein alpha i subunit</b>       | 2 bp upstream         | Asymmetric neuroblast division and asymmetric protein localization involved in cell fate determination; cytoskeleton organization; and nervous system development                |                                                                                                                                               |
| <b>21</b> |                              | 140,207  | 1.34E-06 | 0.107 |                                        | 3 bp upstream         |                                                                                                                                                                                  |                                                                                                                                               |
| <b>4</b>  | scaffold00053<br>[434,434]   | 135,098  | 1.20E-07 | 0.048 | <b>sloppy paired 2</b>                 | 560 bp upstream       | Transcription factor that regulates embryonic segment polarity and neural fate specification by temporal patterning of medulla neuroblasts                                       |                                                                                                                                               |
|           |                              |          |          |       | <b>CG11018</b>                         | 1,809 bp upstream     |                                                                                                                                                                                  | Unknown                                                                                                                                       |
| <b>5</b>  | scaffold00071<br>[361,359]   | 290,082  | 1.42E-07 | 0.048 | <b>CG32655</b>                         | 9,932 bp downstream   | Unknown                                                                                                                                                                          |                                                                                                                                               |
|           |                              |          |          |       | <b>tenascin accessory</b>              | 42,315 bp downstream  |                                                                                                                                                                                  | Nervous system development; regulation of cell-cell adhesion; and synapse organization                                                        |
|           |                              |          |          |       | <b>tracheus</b>                        | within intron         |                                                                                                                                                                                  |                                                                                                                                               |
| <b>8</b>  | scaffold00298<br>[138,236]   | 48,050   | 4.78E-07 | 0.069 | <b>Site-1 protease</b>                 | within 3rd intron     | Serine endopeptidase involved in proteolysis                                                                                                                                     |                                                                                                                                               |
| <b>9</b>  | scaffold00088<br>[305,641]   | 170,647  | 5.23E-07 | 0.069 | <b>CG42404</b>                         | within 3rd exon       | Unknown                                                                                                                                                                          |                                                                                                                                               |
| <b>10</b> | scaffold00098<br>[290,702]   | 51,932   | 5.38E-07 | 0.069 | <b>Ecdysone-induced protein 75B</b>    | 4,151 bp upstream     | Encodes a nuclear receptor involved in ecdysis, chitin-based cuticle; regulation of ecdysteroid metabolic process; controls neuronal remodeling                                  |                                                                                                                                               |
| <b>11</b> | scaffold00069<br>[371,200]   | 339,968  | 5.42E-07 | 0.069 | <b>CG3216</b>                          | 1,210 bp upstream     | Membrane receptor guanylyl cyclase                                                                                                                                               |                                                                                                                                               |
|           |                              |          |          |       | <b>proteasome alpha3 subunit</b>       | 260 bp upstream       |                                                                                                                                                                                  | Degrades polyubiquitinated proteins in the cytoplasm and nucleus                                                                              |
| <b>12</b> | scaffold00045<br>[452,822]   | 130,642  | 5.54E-07 | 0.069 | <b>pyramus</b>                         | 52,851 bp downstream  | Fibroblast growth factor involved in larval development; mesoderm formation; and neurogenesis                                                                                    |                                                                                                                                               |
|           |                              |          |          |       | <b>thisbe</b>                          | 40,381 bp upstream    |                                                                                                                                                                                  | Fibroblast growth factor involved in glial cell development; larval muscle development; mesodermal cell migration and cell fate specification |
| <b>13</b> | scaffold00046<br>[471,014]   | 90,481   | 5.75E-07 | 0.069 | <b>Ets at 97D</b>                      | 89 bp downstream      | Transcription factor regulates mitochondrial mass; cellular response to starvation; egg chamber differentiation                                                                  |                                                                                                                                               |
| <b>20</b> |                              | 90,474   | 1.31E-06 | 0.107 |                                        | 82 bp downstream      |                                                                                                                                                                                  |                                                                                                                                               |
| <b>14</b> | scaffold00001<br>[2,846,614] | 664,693  | 5.75E-07 | 0.069 | <b>transcript 48</b>                   | 410 bp downstream     | Ventral furrow formation during gastrulation                                                                                                                                     |                                                                                                                                               |
|           |                              |          |          |       | <b>CG11560</b>                         | 85,795 bp downstream  |                                                                                                                                                                                  | Transcription factor expressed in the developing nervous system                                                                               |
|           |                              |          |          |       | <b>adenosine deaminase</b>             | 6,126 bp downstream   |                                                                                                                                                                                  |                                                                                                                                               |
| <b>15</b> | scaffold00080<br>[330,737]   | 162,285  | 6.37E-07 | 0.071 | <b>kekkon 5</b>                        | 18,362 bp upstream    | Transmembrane protein enriched in embryonic central nervous system and regulates the bone morphogenetic protein (BMP) signaling pathway involved in tissue patterning and growth |                                                                                                                                               |
| <b>17</b> | scaffold00107<br>[273,675]   | 220,388  | 7.74E-07 | 0.076 | <b>CG17786</b>                         | 4,651 bp downstream   | Unknown                                                                                                                                                                          |                                                                                                                                               |
|           |                              |          |          |       | <b>twin</b>                            | 6,663 bp upstream     |                                                                                                                                                                                  | Degrades mRNA poly(A) tails; involved in female germ-line stem cell asymmetric division                                                       |
| <b>18</b> | scaffold00118<br>[259,145]   | 234,065  | 9.54E-07 | 0.084 | <b>tubulin tyrosine ligase-like 1B</b> | within exon           | Catalyzes ligations of amino acids to tubulins; predicted to be involved in microtubule cytoskeleton organization                                                                |                                                                                                                                               |
| <b>19</b> | scaffold00121<br>[259,553]   | 226,706  | 9.57E-07 | 0.084 | <b>outsiders</b>                       | 194 bp upstream       | Programmed cell death of primordial germ cell/pole cells                                                                                                                         |                                                                                                                                               |
|           |                              |          |          |       | <b>CG8051</b>                          | 11,337 bp downstream  |                                                                                                                                                                                  | Dorsal thorax formation and bristle development; expressed in blood-brain barrier surface glia                                                |
| <b>22</b> | scaffold00065<br>[398,966]   | 19,097   | 1.46E-06 | 0.107 | <b>nudC</b>                            | 5,354 bp upstream     | Nucleus localization and positive regulation of dendrite morphogenesis                                                                                                           |                                                                                                                                               |
|           |                              |          |          |       | <b>CG9674</b>                          | 3,104 bp upstream     |                                                                                                                                                                                  | Predicted to be involved in ammonia assimilation cycle and glutamate biosynthetic process                                                     |
| <b>23</b> | scaffold00047<br>[463,252]   | 34,694   | 1.51E-06 | 0.107 | <b>nuclear fallout</b>                 | within intron         | Actin cytoskeleton reorganization during furrow formation; sensory organ precursor cell fate determination                                                                       |                                                                                                                                               |

bioRxiv preprint doi: <https://doi.org/10.1101/2020.09.07.083253>; this version posted September 23, 2021. The copyright holder for this preprint (which was not certified by peer review) is the author/funder, who has granted bioRxiv a license to display the preprint in perpetuity. It is made available under aCC-BY-NC 4.0 International license.

<sup>a</sup> Inferences about gene function were based on orthologous function in *D. melanogaster* from Flybase FB2020\_01.

bioRxiv preprint doi: <https://doi.org/10.1101/2020.05.07.083253>; this version posted September 23, 2021. The copyright holder for this preprint (which was not certified by peer review) is the author/funder, who has granted bioRxiv a license to display the preprint in perpetuity. It is made available under a [CC-BY-NC 4.0 International license](#).

Table S10. Genes annotated with enriched gene ontology (GO) terms that intersected the most significant pool-GWAS SNPs.<sup>a</sup>

| Scaffold                                                                                     | Position | -log <sub>10</sub> (P) | Genome-wide Rank <sup>b</sup> | Gene ID ( <i>S. flava</i> )        | Ortholog ID ( <i>D. mel.</i> ) | Ortholog Name       |
|----------------------------------------------------------------------------------------------|----------|------------------------|-------------------------------|------------------------------------|--------------------------------|---------------------|
| <b>DNA-binding transcription repressor activity, RNA polymerase II-specific (GO:0001227)</b> |          |                        |                               |                                    |                                |                     |
| scaffold00328                                                                                | 130182   | 5.763                  | 23                            | scaffold00328-augustus-gene-0.67   | FBgn0001168                    | <i>h</i>            |
| scaffold00222                                                                                | 139175   | 5.364                  | 39                            | scaffold00222-augustus-gene-0.55   | FBgn0038244                    | <i>CG7987</i>       |
| scaffold00521                                                                                | 31530    | 4.429                  | 237                           | scaffold00521-augustus-gene-0.30   | FBgn0008646                    | <i>E5</i>           |
| scaffold00355                                                                                | 77106    | 4.414                  | 244                           | scaffold00355-augustus-gene-0.40   | FBgn0035137                    | <i>CG1233</i>       |
| scaffold00751                                                                                | 23120    | 4.381                  | 266                           | scaffold00751-augustus-gene-0.20   | FBgn0011648                    | <i>Mad</i>          |
| scaffold00332                                                                                | 46880    | 4.252                  | 351                           | scaffold00332-augustus-gene-0.52   | FBgn0034520                    | <i>lms</i>          |
| scaffold00196                                                                                | 39864    | 4.217                  | 369                           | scaffold00196-processed-gene-0.17  | FBgn0002733                    | <i>E(spl)mβ-HLH</i> |
| scaffold00096                                                                                | 260245   | 4.190                  | 379                           | scaffold00096-augustus-gene-1.80   | FBgn0015371                    | <i>chn</i>          |
| scaffold00115                                                                                | 115881   | 4.157                  | 405                           | scaffold00115-augustus-gene-1.53   | FBgn0038852                    | <i>HHEX</i>         |
| scaffold00160                                                                                | 26969    | 4.023                  | 509                           | scaffold00160-augustus-gene-0.20   | FBgn0010109                    | <i>dpn</i>          |
| scaffold00302                                                                                | 38793    | 3.696                  | 943                           | scaffold00302-augustus-gene-0.63   | FBgn0011655                    | <i>Med</i>          |
| scaffold00012                                                                                | 430878   | 3.521                  | 1269                          | scaffold00012-augustus-gene-4.41   | FBgn0027788                    | <i>Hey</i>          |
| scaffold00394                                                                                | 52743    | 3.442                  | 1466                          | scaffold00394-processed-gene-0.15  | FBgn0032295                    | <i>CG12299</i>      |
| scaffold00216                                                                                | 115550   | 3.420                  | 1520                          | scaffold00216-augustus-gene-0.117  | FBgn0261983                    | <i>l(2)gd1</i>      |
| scaffold00001                                                                                | 1171740  | 3.418                  | 1528                          | scaffold00001-processed-gene-11.15 | FBgn0038390                    | <i>Rbf2</i>         |
| scaffold00363                                                                                | 49064    | 3.417                  | 1531                          | scaffold00363-augustus-gene-0.72   | FBgn0000097                    | <i>aop</i>          |
| <b>Phosphatidylinositol biosynthetic process (GO:0006661)</b>                                |          |                        |                               |                                    |                                |                     |
| scaffold00007                                                                                | 1028925  | 5.436                  | 36                            | scaffold00007-augustus-gene-9.68   | FBgn0015278 <sup>c</sup>       | <i>Pi3K68D</i>      |
| scaffold00482                                                                                | 46732    | 5.374                  | 37                            | scaffold00482-processed-gene-0.12  | FBgn0034789 <sup>d</sup>       | <i>PIP5K59B</i>     |
| scaffold00977                                                                                | 3771     | 4.408                  | 246                           | scaffold00977-augustus-gene-0.24   | FBgn0037916                    | <i>CG5342</i>       |
| scaffold00172                                                                                | 34359    | 4.176                  | 390                           | scaffold00172-augustus-gene-0.45   | FBgn0034346                    | <i>PIG-O</i>        |
| scaffold00006                                                                                | 144520   | 3.714                  | 910                           | scaffold00006-augustus-gene-1.43   | FBgn0029818                    | <i>GAA1</i>         |
| scaffold00158                                                                                | 47689    | 3.704                  | 929                           | scaffold00158-augustus-gene-0.29   | FBgn0266438                    | <i>PIG-Z</i>        |
| scaffold00012                                                                                | 159183   | 3.562                  | 1184                          | scaffold00012-snap-gene-1.49       | FBgn0034789                    | <i>PIP5K59B</i>     |
| scaffold00046                                                                                | 138764   | 3.479                  | 1376                          | scaffold00046-processed-gene-1.2   | FBgn0265190                    | <i>PIG-S</i>        |
| <b>Establishment of cell polarity (GO:0030010)</b>                                           |          |                        |                               |                                    |                                |                     |
| scaffold00063                                                                                | 140206   | 7.175                  | 2                             | scaffold00063-augustus-gene-1.49   | FBgn0001104                    | <i>Gai</i>          |
| scaffold00007                                                                                | 1028925  | 5.436                  | 36                            | scaffold00007-augustus-gene-9.68   | FBgn0036206 <sup>c</sup>       | <i>CG5964</i>       |
| scaffold00482                                                                                | 46732    | 5.374                  | 37                            | scaffold00482-processed-gene-0.12  | FBgn0016984 <sup>d</sup>       | <i>skt1</i>         |
| scaffold00297                                                                                | 77172    | 5.354                  | 40                            | scaffold00297-augustus-gene-0.26   | FBgn0263289                    | <i>scrib</i>        |

|               |       |       |    |                                  |             |               |
|---------------|-------|-------|----|----------------------------------|-------------|---------------|
| scaffold01112 | 22724 | 5.253 | 50 | scaffold01112-augustus-gene-0.15 | FBgn0019968 | <i>Khc-73</i> |
|---------------|-------|-------|----|----------------------------------|-------------|---------------|

<sup>a</sup> These correspond to gene:SNP intersections summarized in Table 2.

<sup>b</sup> Different SNP filters were applied prior to candidate gene list construction and GO enrichment analyses (see Methods). The filter applied prior to the latter analysis was more stringent, resulting in the exclusion of more SNPs and, consequently, different p-value rankings (e.g., *Gai*'s p-value rank among all considered SNPs is #2 in the GO Enrichment analysis above, but #3 in the candidate gene investigation in Table 1).

<sup>c</sup> These two gene models physically overlap in *D. melanogaster* and consequently were assigned orthology to the same *S. flava* gene.

<sup>d</sup> scaffold00482-processed-gene-0.12 was assigned orthology to both FBgn0034789 and FBgn0016984, which encode proteins with a Phosphatidylinositol-4-phosphate 5-kinase core domain.

Table S11. Summary of the regression model testing for the additive effects of a candidate SNP on ovipositor bristle number from individually sequenced *S. flava* flies. The SNP was identified from the pool-GWAS on ovipositor bristle number, and is located upstream of the neural development gene G alpha i subunit (*Gαi*). The model also tests for the effects of peg pool (high or low), ovipositor length, population/host plant (which could not be disentangled; NH1/*Barbarea vulgaris*/*Turritis glabra*, NH2/*B. vulgaris*, or NH2/*T. glabra*). For peg pool categorization, the reference category is 'high,' and for host plant/population, it is 'NH1/*Barbarea vulgaris*/*Turritis glabra*'. Sequence data for this analysis has been deposited on Genbank (accession no. MH884655-MH884734).  $R^2 = 0.919$ ,  $F_{5,68} = 154.9$ ,  $p < 0.001$ ,  $n = 74$  individuals.

bioRxiv preprint doi: <https://doi.org/10.1101/2020.09.23.317201>; this version posted September 23, 2020. The copyright holder for this preprint (which was not certified by peer review) is the author/funder, who has granted bioRxiv a license to display the preprint in perpetuity. It is made available under aCC-BY-NC 4.0 International license.

| term                                           | estimate | s.e.m. | t       | p      |
|------------------------------------------------|----------|--------|---------|--------|
| intercept                                      | 29.983   | 3.446  | 8.702   | <0.001 |
| SNP                                            | 0.583    | 0.203  | 2.876   | 0.005  |
| Peg pool (low)                                 | -8.11    | 0.325  | -24.949 | <0.001 |
| Ovipositor length                              | 50.972   | 13.748 | 3.708   | <0.001 |
| Population/Host plant (NH2/ <i>B.</i>          | -0.889   | 0.392  | -2.27   | 0.026  |
| Population/Host plant (NH2/ <i>T. glabra</i> ) | 0.556    | 0.391  | 1.422   | 0.16   |



Table S12. Summary of the regression model testing for the effects of a candidate SNP (additive), peg pool (high or low), and population/host plant (NH1/Barbarea vulgaris/Turritis glabra, NH2/B. vulgaris, or NH2/T. glabra) on ovipositor length from individually sequenced *S. flava* flies. The candidate SNP was identified from the pool-GWAS on ovipositor bristle number, and is located upstream of the neural development gene *G alpha i* subunit (*Gai*). For peg pool categorization, the reference category is ‘high,’ and for host plant/population, it is ‘NH1/Barbarea vulgaris/Turritis glabra’. Sequence data for this analysis has been deposited on Genbank (accession no. MH884655-MH884734).  $R^2 = 0.108$ ,  $F_{4, 69} = 2.085$ ,  $p = 0.092$ ,  $n = 74$  species.

| <b>term</b>                             | <b>estimate</b> | <b>s.e.m</b> | <b><i>t</i></b> | <b><i>p</i></b> |
|-----------------------------------------|-----------------|--------------|-----------------|-----------------|
| intercept                               | 0.249           | 0.003        | 74.431          | <0.001          |
| SNP                                     | <0.001          | 0.002        | 0.177           | 0.86            |
| Peg pool (low)                          | <0.001          | 0.003        | 0.013           | 0.99            |
| Population/Host plant (NH2/B. vulgaris) | 0.009           | 0.003        | 2.81            | 0.006           |
| Population/Host plant (NH2/T. glabra)   | 0.003           | 0.003        | 0.956           | 0.342           |

Table S13. Linkage disequilibrium estimates between the focal SNP identified from pool-GWA (locus 214), located upstream of the neural development gene *Gai*, and neighboring variants identified from individual re-sequencing. Delta values estimate correlations among unphased alleles. Strong LD values ( $|\delta| > 0.5$  (p value < 0.01) are shown in bold italics.

| Variant locus | Delta $\delta$ |                         |            |            | T2     | df | P-value  |
|---------------|----------------|-------------------------|------------|------------|--------|----|----------|
|               | AA             | Aa                      | aA         | aa         |        |    |          |
| 213           | -0.229821      | <b><i>0.6081994</i></b> | -0.1485573 | -0.229821  | 106.03 | 1  | 7.26E-25 |
| 215           | -0.2529218     | 0.2529218               | 0.2529218  | -0.2529218 | 48.64  | 1  | 3.08E-12 |
| 235           | -0.2907232     | 0.2907232               | 0.2907232  | -0.2907232 | 65.01  | 1  | 7.47E-16 |
| 236           | 0.2849708      | -0.2849708              | -0.2849708 | 0.2849708  | 68.1   | 1  | 1.55E-16 |

bioRxiv preprint doi: <https://doi.org/10.1101/2020.05.07.053253>; this version posted September 23, 2021. The copyright holder for this preprint (which was not certified by peer review) is the author/funder, who has granted bioRxiv a license to display the preprint in perpetuity. It is made available under aCC-BY-NC 4.0 International license.
